# Supplementary material for: Low-cost synthesis of soluble bay-substituted terrylenes for p-type charge transport and efficient photodetection on field-effect transistors
Source: Royal Society of Chemistry journal article supplement (doi:10.1039/d5tc00477b), 2025-01-01
Supplement: d5tc00477b1.pdf [file d5tc00477b1.pdf]

## Electronic Supplementary Information (ESI<sup>†</sup>)

### **Low-Cost Synthesis of Soluble Bay-Substituted Terrylenes for p-Type Charge Transport and Efficient Photodetection on Field-Effect Transistors**

*Chitrak Ghosh,<sup>#[a]</sup> Hayeong Park,<sup>#[b]</sup> Amrita Hazra,<sup>[a]</sup> Buddhadeb Mondal,<sup>[a]</sup> Minji Chung,<sup>[b]</sup> Ullrich Scherf,<sup>[c]</sup> Joon Hak Oh<sup>\*[b]</sup> and Suman Kalyan Samanta<sup>\*[a]</sup>*

[a] Department of Chemistry, Indian Institute of Technology Kharagpur, Kharagpur 721302, India.

[b] School of Chemical and Biological Engineering, Institute of Chemical Processes, Seoul National University, Seoul 08826, Republic of Korea.

[c] Macromolecular Chemistry Group (buwmakro) and Wuppertal Center for Smart Materials and Systems (CM@S), D-42119 Wuppertal, Germany

## Experimental Section

### Materials and methods

All the reagents, starting materials (2,3-dihydroxynaphthalene, alkyl bromides,  $K_2CO_3$ ,  $Br_2$ , magnesium turnings, 1-bromo-8-chloronaphthalene,  $Ni(acac)_2$ , and  $KOH$ ), solvents and inorganic salts were purchased from commercial suppliers and were used without further purification. Solvents were dried as per literature procedure prior to use according to the requirements. Thin layer chromatography (TLC) on silica gel GF<sub>254</sub> was used for the determination of  $R_f$  values, and the visualization was performed by irradiation with UV lamp at 254 nm. Column chromatography was performed on Merck silica gel (100-200 mesh) with the eluent as mentioned.  $^1H$  (400 MHz),  $^1H$  (500 MHz) and  $^{13}C$  (125 MHz) NMR spectra were recorded in a Bruker 400 UltraShield and Bruker Ascend-500 NMR spectrometer in deuterated solvents at ambient temperature (300 K). Chemical shifts are reported in ppm ( $\delta$ ) relative to tetramethylsilane (TMS) as the internal standard ( $CDCl_3$   $\delta$  7.26 ppm for  $^1H$  and 77.0 ppm for  $^{13}C$ ). Matrix-assisted laser desorption/ionization mass spectrometry was recorded in an Autoflex Speed LRF (Bruker) instrument. Thermogravimetric Analysis (TGA) was performed on a Pyris Diamond TG DTA (Perkin Elmer) instrument under argon with 12 °C/min heating rate. Differential scanning calorimetry was performed in a DSC25 (TA instrument) at a heating rate of 10 °C in both exothermic and endothermic scans.

### Measurements of Optical Properties

UV-visible absorption spectra were recorded on a Shimadzu UV-2550 UV-vis spectrophotometer, and the fluorescence spectra were recorded on a Shimadzu RF-6000 spectrofluorometer. Fluorescence quantum yields were recorded on a Edinburgh FLS 1000 spectrofluorometer. All three compounds were taken as a solution with 10  $\mu M$  concentration. For fluorescence lifetime measurement, a picoseconds diode laser (IBH, UK, Nanoled) was used as a light source at the excitation wavelength of 510 nm. The signal was detected in magic angle (54.7°) polarization using a Hamamatsu MCP PMT (3809U), and the decays were analyzed using IBH DAS-6 decay analysis software. Optical bandgaps were measured from the equation:  $E_g^{opt} = 1240/\lambda_{onset}$ . Absorption spectra of a thin film of the small molecules were recorded using a Cary 5000 UV-vis-NIR spectrophotometer (Agilent Technologies, Inc., USA). Thin films of the small molecules were made in a quartz plate by spin coating the 5 mg mL<sup>-1</sup> solution in chloroform, followed by the optimized annealing process. The radiative and nonradiative rate ( $k_r$  and  $k_{nr}$ ) were measured using equations,

$$k_r = \frac{\phi_F}{\tau}$$

$$\phi_F = \frac{k_r}{k_r + k_{nr}}$$

## Cyclic Voltammetry Experiments

The electrochemical properties were characterized by a three-electrode cell with a polished 2 mm glassy carbon as the working electrode, Pt as the counter electrode, and Ag/AgCl as the reference electrode. The electrolytic solution employed was 0.1 M tetra-*n*-butylammonium perchlorate in dry dichloromethane at a scan rate of 0.1 V/s under an argon atmosphere. The reference electrode was calibrated using a ferrocene/ferrocenium redox couple as an external standard. The LUMO and HOMO energy levels of the compounds were determined by using the empirical equation,<sup>1</sup>

$$E_{\text{LUMO}} = -5.1 - [E_{\text{red}} - E_{1/2}(\text{Fc}/\text{Fc}^+)] \text{ eV}$$

$$E_{\text{HOMO}} = -5.1 - [E_{\text{ox}} - E_{1/2}(\text{Fc}/\text{Fc}^+)] \text{ eV}$$

## Theoretical Calculations

The ground states of the molecules were optimized using the DFT/B3LYP method<sup>2,3</sup> with the 6-31G\* basis set in Gaussian 16.<sup>4</sup> To generate the ESP maps, Gaussview was used.<sup>5</sup>

## Atomic Force Microscopy

AFM images of the thin films were captured using an NX-10 system (Park Systems, Korea). Thin films of the small molecules were fabricated by spin coating the 5 mg mL<sup>-1</sup> solution in chloroform onto *n*-octadecyltrimethoxysilane (OTS)-modified Si/SiO<sub>2</sub> substrates, followed by the desired annealing process. The height and phase images were obtained in the high-resolution tapping mode under ambient conditions. The root-mean-square surface roughness ( $R_{\text{RMS}}$ ) was measured from AFM topographic images (2 μm x 2 μm).

## Grazing Incidence X-ray Diffraction (GIXD)

GIWAXS measurements were performed at PLS-II 9A U-SAXS beamline of Pohang Accelerator Laboratory in Korea.

## OFET devices fabrication

OFETs based on the thin films of the small molecules were fabricated using heavily *n*-doped (100) silicon wafers with 300 nm thick SiO<sub>2</sub> ( $C_i = 11.5 \text{ nF cm}^{-2}$ ). The wafers were cleaned with a piranha solution for 30 min and underwent UV-ozone treatment. Subsequently, the wafer surface was treated with OTS to create a self-assembled monolayer, following a previously reported method. 5 mg mL<sup>-1</sup> solution of the small molecules in chloroform was spin-coated onto the wafers at 1000 rpm for 30 s, and then annealed at the desired temperature in an N<sub>2</sub> environment. Subsequently, 40 nm-thick gold electrodes were thermally evaporated onto the thin films to form the source and drain electrodes using a shadow mask, with dimensions of 50 and 1,000 μm, respectively. To figure out the hole mobilities from transfer curves, the drain voltage ( $V_{DS}$ ) is set to -100 V, and the gate voltage ( $V_{GS}$ ) is swept from 20 V to -100 V. The electrical performances of OFETs were measured in an N<sub>2</sub> environment using a Keithley 4200-SCS semiconductor parametric analyzer.

## Estimation of Optoelectrical Properties

To assess the phototransistor characteristics, OFET-based organic phototransistors (OPTs) were fabricated. To quantify the photosensitivity of OPTs, we calculated the photoresponsivity ( $R$ ) and photo-current/dark-current ratio ( $p$ ) through transfer characteristics under dark and light irradiation ( $\lambda = 532 \text{ nm}$ ,  $P_{\text{max}} = 79.2 \text{ mW cm}^{-2}$ ) conditions. The  $R$  and  $p$  values are typically defined by the following equations:

$$R = \frac{I_{ph}}{P_{inc}} = \frac{I_{light} - I_{dark}}{P_{inc}}$$
$$p = \frac{I_{light} - I_{dark}}{I_{dark}}$$

Where  $I_{ph}$  is the photocurrent,  $P_{inc}$  is the incident illumination power on the channel of the device,  $I_{light}$  is the drain current under illumination, and  $I_{dark}$  is the drain current in the dark. Additionally, the external quantum efficiency (EQE) ( $\eta$ ) of OPTs was calculated, which quantifies the ratio of photogenerated carriers that effectively enhance the drain current to the number of photons incident on the OPT channel using the equation,

$$\eta = \frac{(I_{light} - I_{dark})hc}{eP_{inc}A\lambda_{peak}}$$

where  $h$  is Plank's constant,  $c$  is the speed of light,  $e$  is the fundamental unit of charge,  $A$  is the area of the transistor channel, and  $\lambda_{peak}$  is the peak wavelength of the incident light.

Detectivity usually indicates the smallest detectable signal, which facilitates comparisons of phototransistor devices with different configurations and areas.  $D^*$  was evaluated within this study using the equations.

$$D^* = \frac{\sqrt{A}}{NEP}$$

$$NEP = \frac{\sqrt{I_n^2}}{R}$$

In these equations,  $A$  is the phototransistor active area, NEP is the noise equivalent power, and  $\overline{I_n^2}$  is the measured noise current. If the major limit to detectivity is shot noise from the drain current under dark conditions, then  $D^*$  can be simplified as

$$D^* = \frac{R}{\sqrt{(2e \cdot I_{dark}/A)}}$$

### Synthesis:

Compound **1** and **2** were synthesized following previous literature reports with minor modification.<sup>6,7</sup>

**General procedure for the Synthesis of 2,3-bis(alkoxy)naphthalene (1a-c):** DMF solution (150 mL) of 2,3-naphthalenediol (5 g, 31.2 mmol) and  $K_2CO_3$  (43.8 g, 317 mmol) were stirred at 125 °C, then 1-bromoalkane (126.7 mmol) was added dropwise into it. The reaction mixture was stirred at 125 °C for 36 h. After that, the solution was poured into water and cooled overnight. The solid was collected and washed with MeOH, to obtain the product as white solids.

**Compound 1a:** Yield 97%.  $^1H$  NMR (500 MHz,  $CDCl_3$ )  $\delta$  7.65 (dd,  $J = 6.1, 3.3$  Hz, 2H), 7.30 (dd,  $J = 6.1, 3.2$  Hz, 2H), 7.12 (s, 2H), 4.11 (t, 4H), 1.96 – 1.84 (m, 4H), 1.56 – 1.46 (m, 4H), 1.42 – 1.28 (m, 16H), 0.90 (t, 6H).  $^{13}C$  NMR (125 MHz,  $CDCl_3$ )  $\delta$  149.67, 129.44, 126.35, 124.06, 108.12, 69.06, 31.99, 29.55, 29.44, 29.29, 26.25, 22.83, 14.24.

**Compound 1b:** Yield 95%.  $^1H$  NMR (500 MHz,  $CDCl_3$ )  $\delta$  7.65 (dd,  $J = 6.1, 3.3$  Hz, 2H), 7.30 (dd,  $J = 6.1, 3.2$  Hz, 2H), 7.12 (s, 2H), 4.11 (t, 4H), 1.94 – 1.84 (m, 4H), 1.56 – 1.48 (m, 4H), 1.41 – 1.25 (m, 32H), 0.89 (t, 6H).  $^{13}C$  NMR (125 MHz,  $CDCl_3$ )  $\delta$  149.67, 129.44, 126.35, 124.06, 108.13, 69.06, 32.08, 29.86, 29.82, 29.80, 29.60, 29.52, 29.29, 26.25, 22.84, 14.25.

Compound **1c**: Yield 90%. <sup>1</sup>H NMR (500 MHz, CDCl<sub>3</sub>) δ 7.65 (dd, *J* = 6.1, 3.3 Hz, 2H), 7.30 (dd, *J* = 6.1, 3.2 Hz, 2H), 7.11 (s, 2H), 4.11 (t, 4H), 1.93 – 1.85 (m, 4H), 1.54 – 1.49 (m, 4H), 1.28 (m, 48H), 0.88 (t, 6H). <sup>13</sup>C NMR (125 MHz, CDCl<sub>3</sub>) δ 149.67, 129.44, 126.36, 124.06, 108.12, 69.06, 32.09, 29.87, 29.82, 29.80, 29.60, 29.52, 29.29, 26.25, 22.84, 14.25.

**General procedure for the Synthesis of 1,4-dibromo-2,3-bis(alkyloxy)naphthalene (2a-c):**

Bromine (2.1 equivalent) in dichloromethane was added into the stirred solution of 2,3-bis(alkyloxy)naphthalene (**1**) in DCM and the mixture was stirred at room temperature for 15 minutes. After that, the excess bromine was quenched with sodium thiosulfate solution in water. Then, the product was extracted from DCM, washed with water and brine, and dried over Na<sub>2</sub>SO<sub>4</sub> and then precipitated in cold methanol to get the pure product as white solid.

Compound **2a**: Yield 90%. <sup>1</sup>H NMR (500 MHz, CDCl<sub>3</sub>) δ 8.24 (dd, *J* = 6.4, 3.3 Hz, 2H), 7.55 (dd, *J* = 6.5, 3.3 Hz, 2H), 4.12 (t, 4H), 1.92 – 1.84 (m, 4H), 1.55 – 1.50 (m, 4H), 1.41 – 1.27 (m, 16H), 0.90 (t, 6H). <sup>13</sup>C NMR (125 MHz, CDCl<sub>3</sub>) δ 150.27, 130.33, 127.41, 127.08, 116.55, 74.62, 32.01, 30.46, 29.62, 29.45, 26.26, 22.82, 14.24.

Compound **2b**: Yield 87%. <sup>1</sup>H NMR (500 MHz, CDCl<sub>3</sub>) δ 8.24 (dd, *J* = 6.4, 3.2 Hz, 2H), 7.54 (dd, *J* = 6.4, 3.3 Hz, 2H), 4.12 (t, 4H), 1.94 – 1.79 (m, 4H), 1.53 (d, 4H), 1.43 – 1.20 (m, 32H), 0.88 (t, 6H). <sup>13</sup>C NMR (125 MHz, CDCl<sub>3</sub>) δ 150.27, 130.33, 127.42, 127.08, 116.55, 74.62, 32.09, 30.46, 29.85, 29.81, 29.66, 29.52, 26.26, 22.85, 14.25.

Compound **2c**: Yield 86%. <sup>1</sup>H NMR (400 MHz, CDCl<sub>3</sub>) δ 8.24 (dd, *J* = 6.4, 3.2 Hz, 2H), 7.54 (dd, *J* = 6.4, 3.2 Hz, 2H), 4.12 (t, 4H), 1.93 – 1.83 (m, 4H), 1.58 – 1.49 (m, 4H), 1.42 – 1.19 (m, 48H), 0.88 (t, 6H). <sup>13</sup>C NMR (125 MHz, CDCl<sub>3</sub>) δ 150.28, 130.34, 127.42, 127.08, 116.55, 74.62, 32.09, 30.46, 29.88, 29.86, 29.83, 29.81, 29.67, 29.53, 26.27, 22.85, 14.25.

**General procedure for the synthesis of 8,8''-dichloro-2',3'-bis(alkyloxy)-1,1',4,1''-ternaphthalene (3a-c):**

Under an argon atmosphere, a mixture of magnesium turnings (68 mmol) and 10 mL of dry THF in an oven-dried flask was stirred at 50 °C and 0.2 mL of 1,2-dibromoethane was added. The mixture was continued heating at 50 °C over a period of 10 minutes and a solution of 1,4-dibromo-2,3-bis(alkyloxy)naphthalene (**2**, 6.78 mmol) in 10 mL of dry THF was added slowly through a syringe. The solution was stirred for one hour at 50 °C to obtain a greyish transparent solution, which was kept carefully for the next step. In another two-neck round bottom flask, 1-bromo-8-chloronaphthalene (13.58 mmol) and Ni(acac)<sub>2</sub> (0.135 mmol) were dissolved in 10 mL dry THF and the Grignard reagent was introduced at

room temperature under argon atmosphere. The mixture was stirred at room temperature for one hour and then acidified with 2N HCl. The product was extracted from CHCl<sub>3</sub>, washed with water and brine, and dried over Na<sub>2</sub>SO<sub>4</sub>. The filtrate was evaporated and the compound was purified by column chromatography on silica gel (hexane/chloroform 9:1) to give compounds **3a-c** as a pale-yellow solid.

**Compound 3a:** Yield 37%. <sup>1</sup>H NMR (400 MHz, CDCl<sub>3</sub>) δ 7.91 (d, *J* = 8.1 Hz, 2H), 7.83 (d, *J* = 8.1 Hz, 2H), 7.56 (t, *J* = 7.6 Hz, 2H), 7.49 (d, *J* = 7.0 Hz, 2H), 7.41 (d, *J* = 7.3 Hz, 2H), 7.31 (t, *J* = 7.7 Hz, 2H), 7.20 (dd, *J* = 8.1, 5.1 Hz, 2H), 7.11 (dd, *J* = 6.4, 3.3 Hz, 2H), 3.85 (dt, 2H), 3.78 – 3.68 (m, 2H), 1.23 – 1.07 (m, 8H), 1.05 – 0.95 (m, 4H), 0.94 – 0.85 (m, 4H), 0.79 (t, 10H), 0.63 – 0.51 (m, 4H). <sup>13</sup>C NMR (125 MHz, CDCl<sub>3</sub>) δ 149.19, 136.19, 133.63, 133.22, 132.45, 131.57, 131.54, 130.49, 129.35, 129.18, 128.58, 126.28, 125.83, 125.55, 124.49, 77.41, 77.16, 76.91, 72.57, 31.86, 30.28, 29.29, 29.22, 25.68, 22.79, 14.23. MALDI-ToF- Calculated (*m/z*): 704.3188; obtained (*m/z*): 704.9735.

**Compound 3b:** Yield 32%. <sup>1</sup>H NMR (400 MHz, CDCl<sub>3</sub>) δ 7.91 (d, *J* = 8.1 Hz, 2H), 7.83 (d, *J* = 8.1 Hz, 2H), 7.56 (t, *J* = 7.6 Hz, 2H), 7.49 (d, *J* = 7.0 Hz, 2H), 7.41 (d, *J* = 7.3 Hz, 2H), 7.31 (t, *J* = 7.7 Hz, 2H), 7.20 (dd, *J* = 8.1, 5.1 Hz, 2H), 7.11 (dd, *J* = 6.4, 3.3 Hz, 2H), 3.85 (dt, 2H), 3.78 – 3.68 (m, 2H), 1.23 – 1.07 (m, 8H), 1.05 – 0.95 (m, 4H), 0.94 – 0.85 (m, 4H), 0.79 (t, 10H), 0.63 – 0.51 (m, 4H). <sup>13</sup>C NMR (125 MHz, CDCl<sub>3</sub>) δ 149.21, 136.20, 133.66, 133.23, 132.46, 131.60, 131.56, 130.51, 129.36, 129.18, 128.58, 126.29, 125.84, 125.55, 124.49, 72.58, 32.11, 30.29, 29.84, 29.82, 29.67, 29.59, 29.54, 29.35, 25.70, 22.86, 14.26. MALDI-ToF- Calculated (*m/z*): 816.4440; obtained (*m/z*): 817.2237.

**Compound 3c:** Yield 30%. <sup>1</sup>H NMR (400 MHz, CDCl<sub>3</sub>) δ 7.99 (d, *J* = 8.0 Hz, 2H), 7.91 (d, *J* = 8.0 Hz, 2H), 7.63 (t, *J* = 7.6 Hz, 2H), 7.56 (d, *J* = 6.9 Hz, 2H), 7.49 (d, *J* = 7.3 Hz, 2H), 7.39 (t, *J* = 7.7 Hz, 2H), 7.27 (dd, *J* = 6.6, 3.5 Hz, 2H), 7.18 (dd, *J* = 6.5, 3.2 Hz, 2H), 3.92 (dt, 2H), 3.80 (dd, 2H), 1.32 – 1.14 (m, 40H), 1.09 (dd, 4H), 0.95 (dd, 4H), 0.89 (t, 10H), 0.65 (dt, 4H). <sup>13</sup>C NMR (125 MHz, CDCl<sub>3</sub>) δ 149.20, 136.19, 133.65, 133.23, 132.46, 131.59, 131.55, 130.50, 129.36, 129.18, 128.58, 126.28, 125.84, 125.55, 124.49, 72.57, 32.09, 30.29, 29.89, 29.88, 29.85, 29.84, 29.68, 29.60, 29.53, 29.36, 25.70, 22.85, 14.25. MALDI-ToF- Calculated (*m/z*): 928.5692; obtained (*m/z*): 929.6367.

**General procedure for the Synthesis of 7,8-bis(hexadecyloxy)terrylene (4a-c):** A solution of compound **3** (0.284 mmol) and excess KOH (260 mmol) in distilled quinoline (2 mL) was

heated at 195 °C under an argon atmosphere for 4 hours. After cooling to room temperature, the product was extracted with chloroform. The organic layer was washed with hydrochloric acid, water, and brine and dried over Na<sub>2</sub>SO<sub>4</sub>. The filtrate was evaporated and purified by column chromatography on silica gel (hexane/chloroform 9:1) to give compounds **4a-c** as a deep purple solid.

**Compound 4a:** Yield 62%. <sup>1</sup>H NMR (500 MHz, CDCl<sub>3</sub>) δ 9.29 (d, *J* = 7.7 Hz, 2H), 8.24 (s, 1H), 8.20 (d, *J* = 7.5 Hz, 2H), 7.72 (dd, *J* = 7.8, 2.5 Hz, 4H), 7.52 (q, *J* = 8.0 Hz, 4H), 4.09 (t, 4H), 1.99 – 1.92 (m, 4H), 1.43 – 1.25 (m, 20H), 0.90 (t, 6H). <sup>13</sup>C NMR (125 MHz, CDCl<sub>3</sub>) δ 152.36, 134.40, 131.34, 130.30, 130.10, 129.19, 128.16, 127.70, 126.94, 126.72, 126.38, 123.53, 121.02, 120.04, 73.02, 32.01, 30.86, 29.74, 29.48, 26.43, 22.84, 14.24. MALDI-ToF- Calculated (m/z): 632.3654; obtained (m/z): 633.1290.

**Compound 4b:** Yield 60%. <sup>1</sup>H NMR (400 MHz, CDCl<sub>3</sub>) δ 9.29 (d, *J* = 7.6 Hz, 2H), 8.23 (s, 2H), 8.20 (d, *J* = 7.3 Hz, 2H), 7.71 (d, *J* = 7.7 Hz, 4H), 7.52 (dd, *J* = 14.3, 7.5 Hz, 4H), 4.08 (t, 4H), 2.00 – 1.88 (m, 4H), 1.57 – 1.48 (m, 4H), 1.43 – 1.22 (m, 32H), 0.89 (t, 6H). <sup>13</sup>C NMR (125 MHz, CDCl<sub>3</sub>) δ 152.37, 134.40, 131.34, 130.31, 130.10, 129.19, 128.17, 127.71, 126.95, 126.72, 126.38, 123.53, 121.03, 120.04, 73.02, 32.10, 30.86, 29.88, 29.84, 29.82, 29.78, 29.54, 26.43, 22.85, 14.25. MALDI-ToF- Calculated (m/z): 744.4906; obtained (m/z): 745.2999.

**Compound 4c:** Yield 53%. <sup>1</sup>H NMR (500 MHz, CDCl<sub>3</sub>) δ 9.28 (d, *J* = 7.3 Hz, 2H), 8.23 (s, 2H), 8.19 (d, *J* = 7.3 Hz, 2H), 7.71 (dd, *J* = 7.9, 3.0 Hz, 4H), 7.52 (dd, *J* = 16.8, 8.0 Hz, 4H), 4.09 (t, 4H), 1.99 – 1.91 (m, 4H), 1.55 – 1.49 (m, 4H), 1.41 – 1.26 (m, 48H), 0.88 (t, 6H). <sup>13</sup>C NMR (125 MHz, CDCl<sub>3</sub>) δ 152.38, 134.41, 131.35, 130.32, 130.11, 129.20, 128.18, 127.72, 126.96, 126.73, 126.39, 123.54, 121.03, 120.04, 73.03, 32.09, 30.86, 29.89, 29.85, 29.84, 29.82, 29.78, 29.53, 29.51, 26.43, 22.84, 14.24. MALDI-ToF- Calculated (m/z): 856.6158; obtained (m/z): 857.6020.



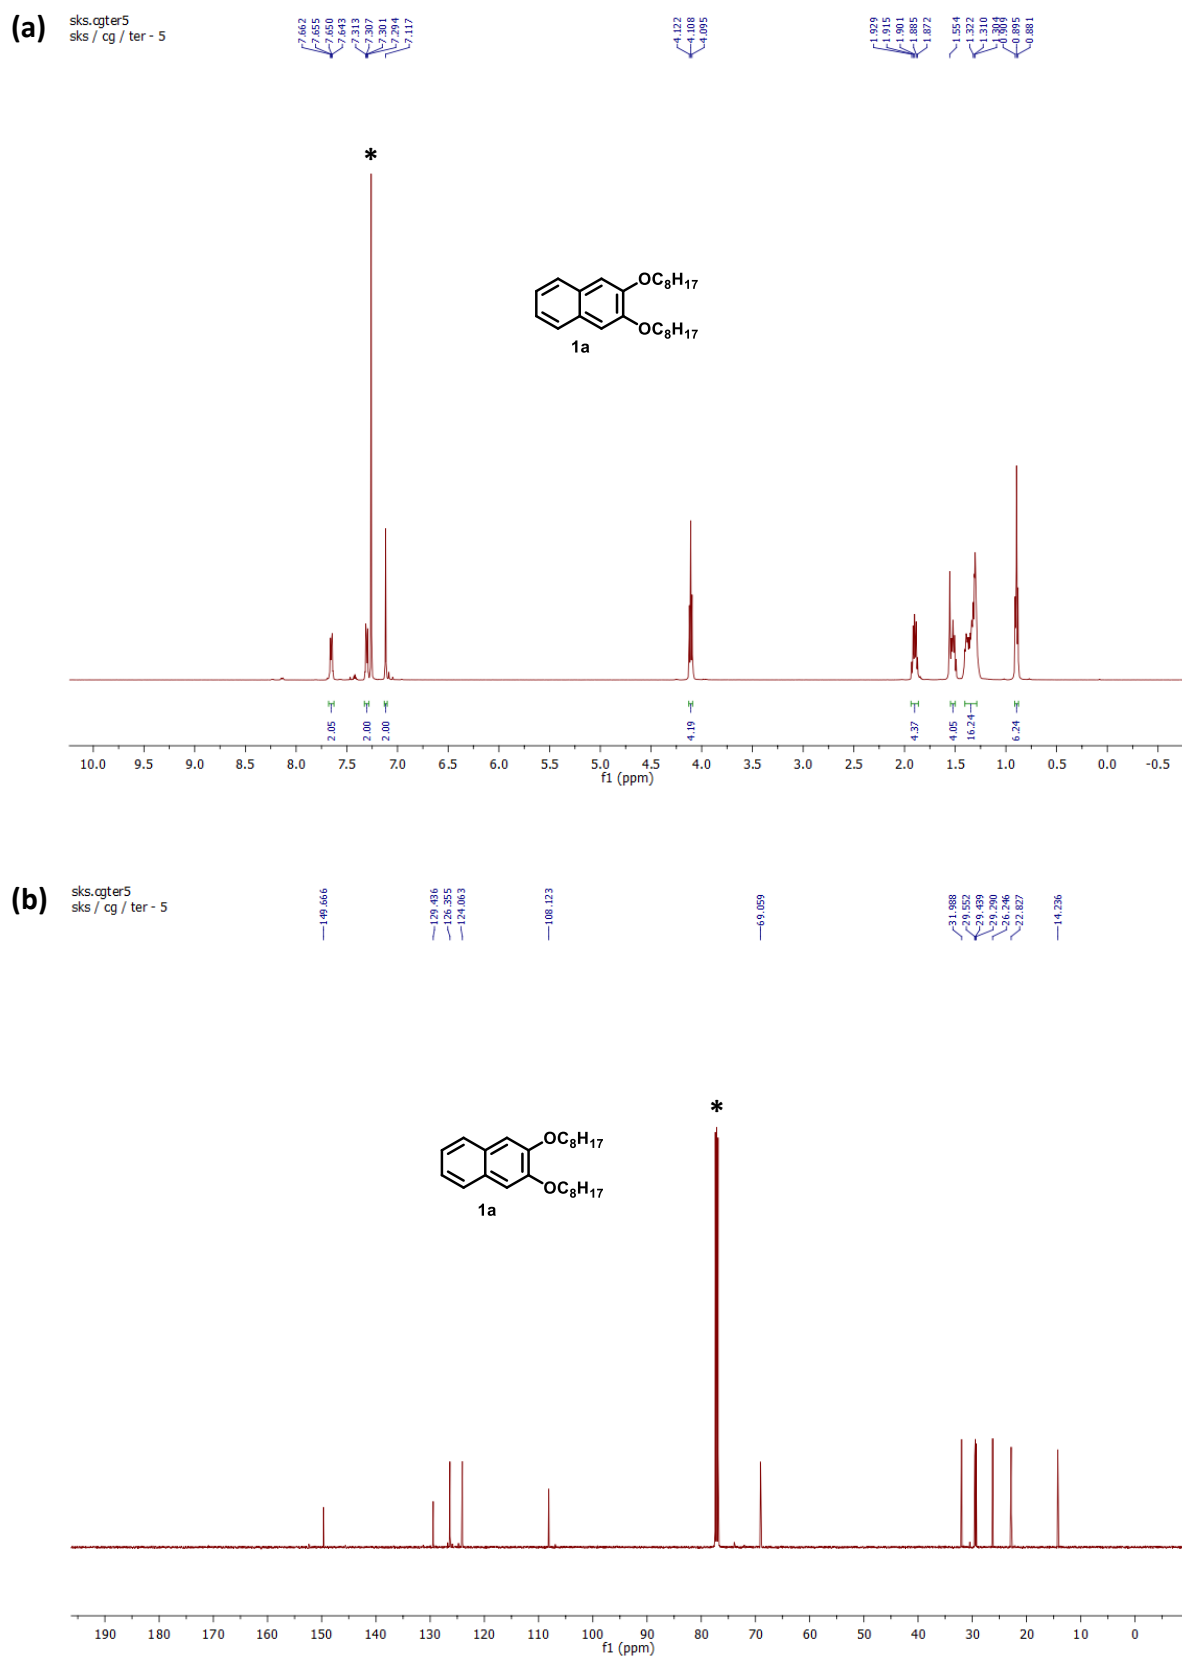

**Fig. S1.** (a)  $^1\text{H}$  and (b)  $^{13}\text{C}$  NMR spectra of **1a** in  $\text{CDCl}_3$  (\*) at 298K.

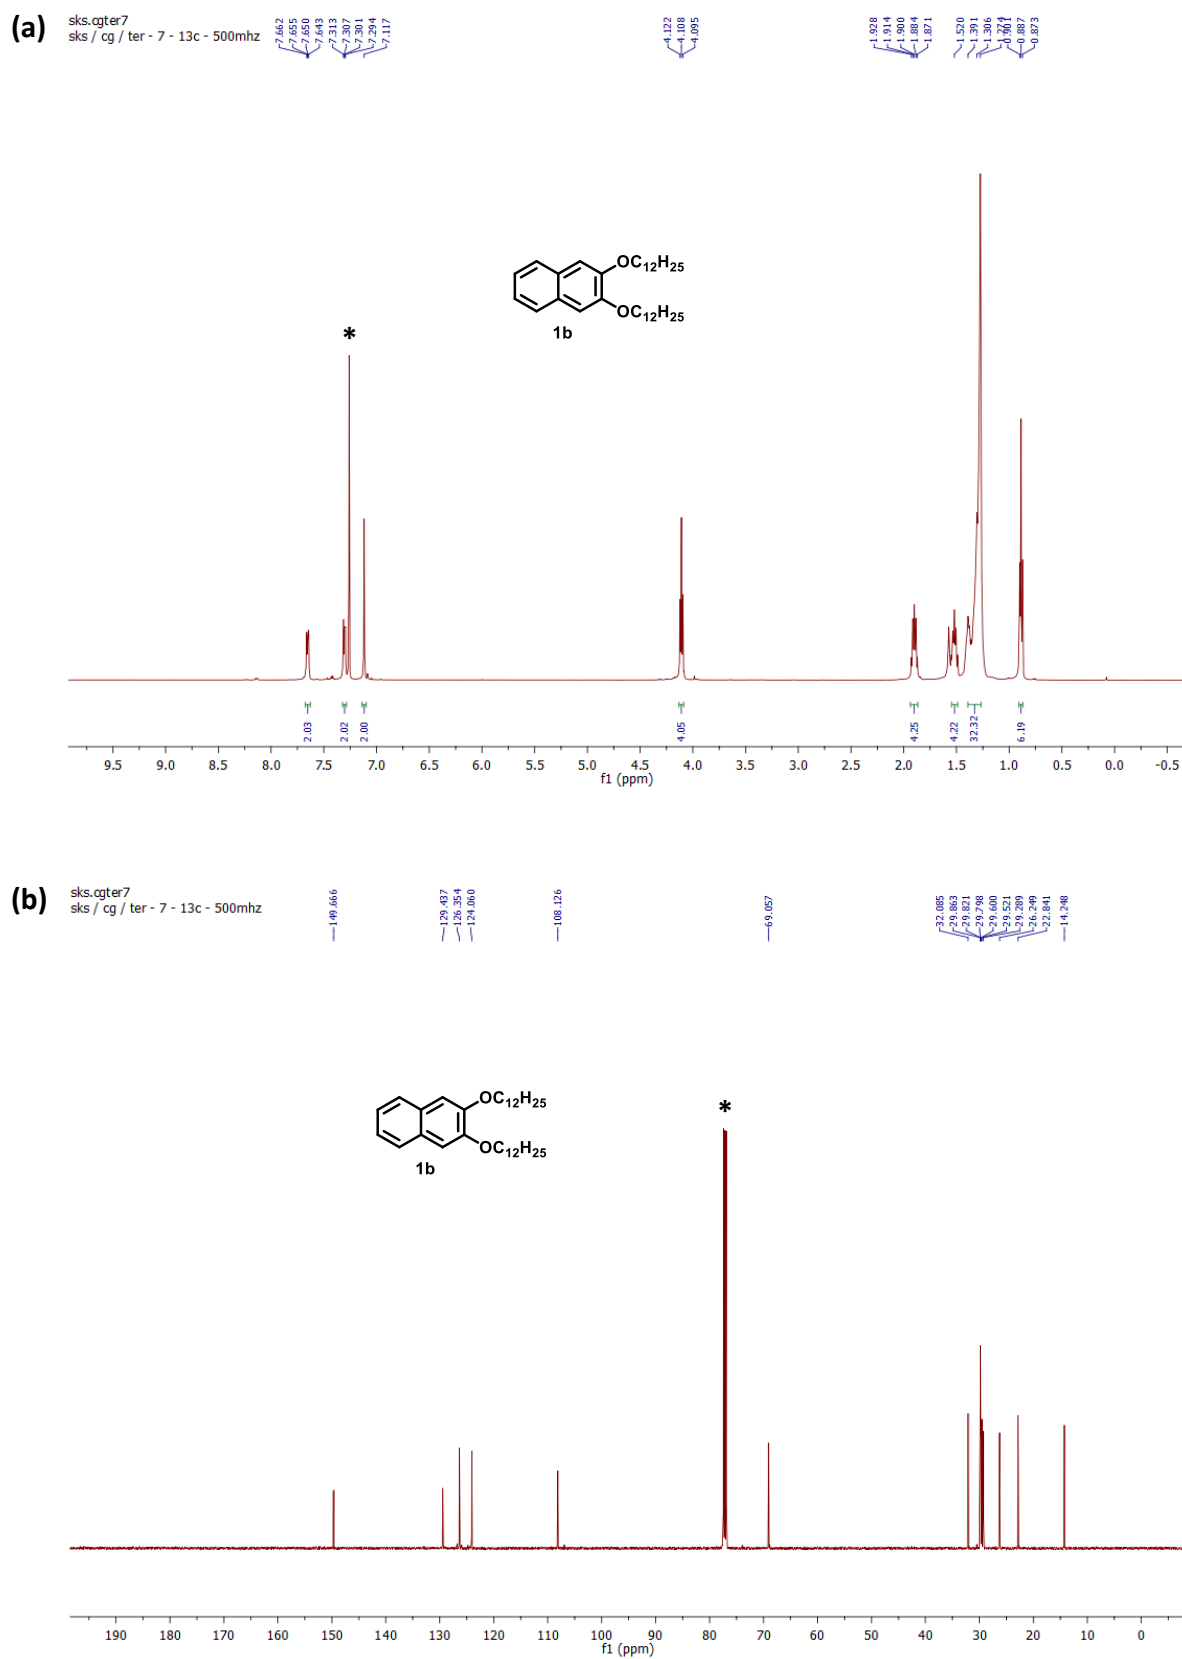

**Fig. S2.** (a)  $^1\text{H}$  and (b)  $^{13}\text{C}$  NMR spectra of **1b** in  $\text{CDCl}_3$  (\*) at 298K.

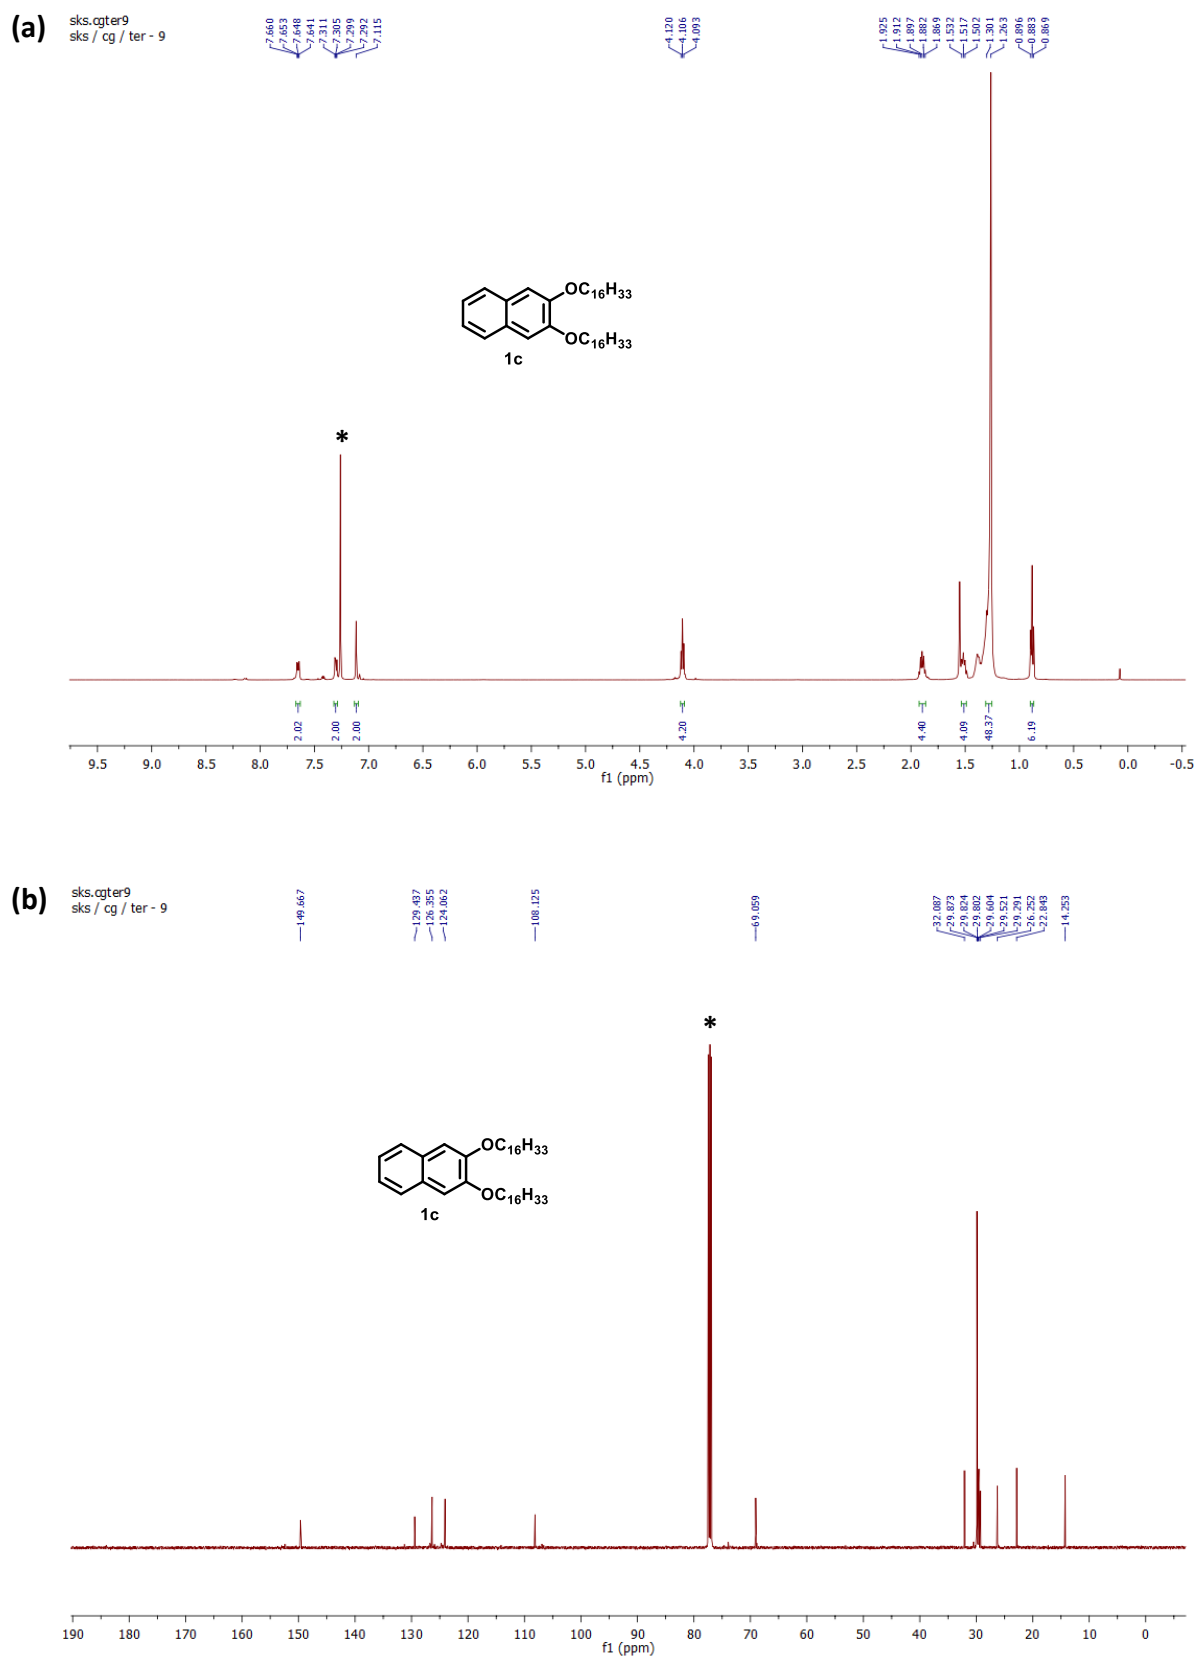

Fig. S3. (a)  $^1\text{H}$  and (b)  $^{13}\text{C}$  NMR spectra of **1c** in  $\text{CDCl}_3$  (\*) at 298K.

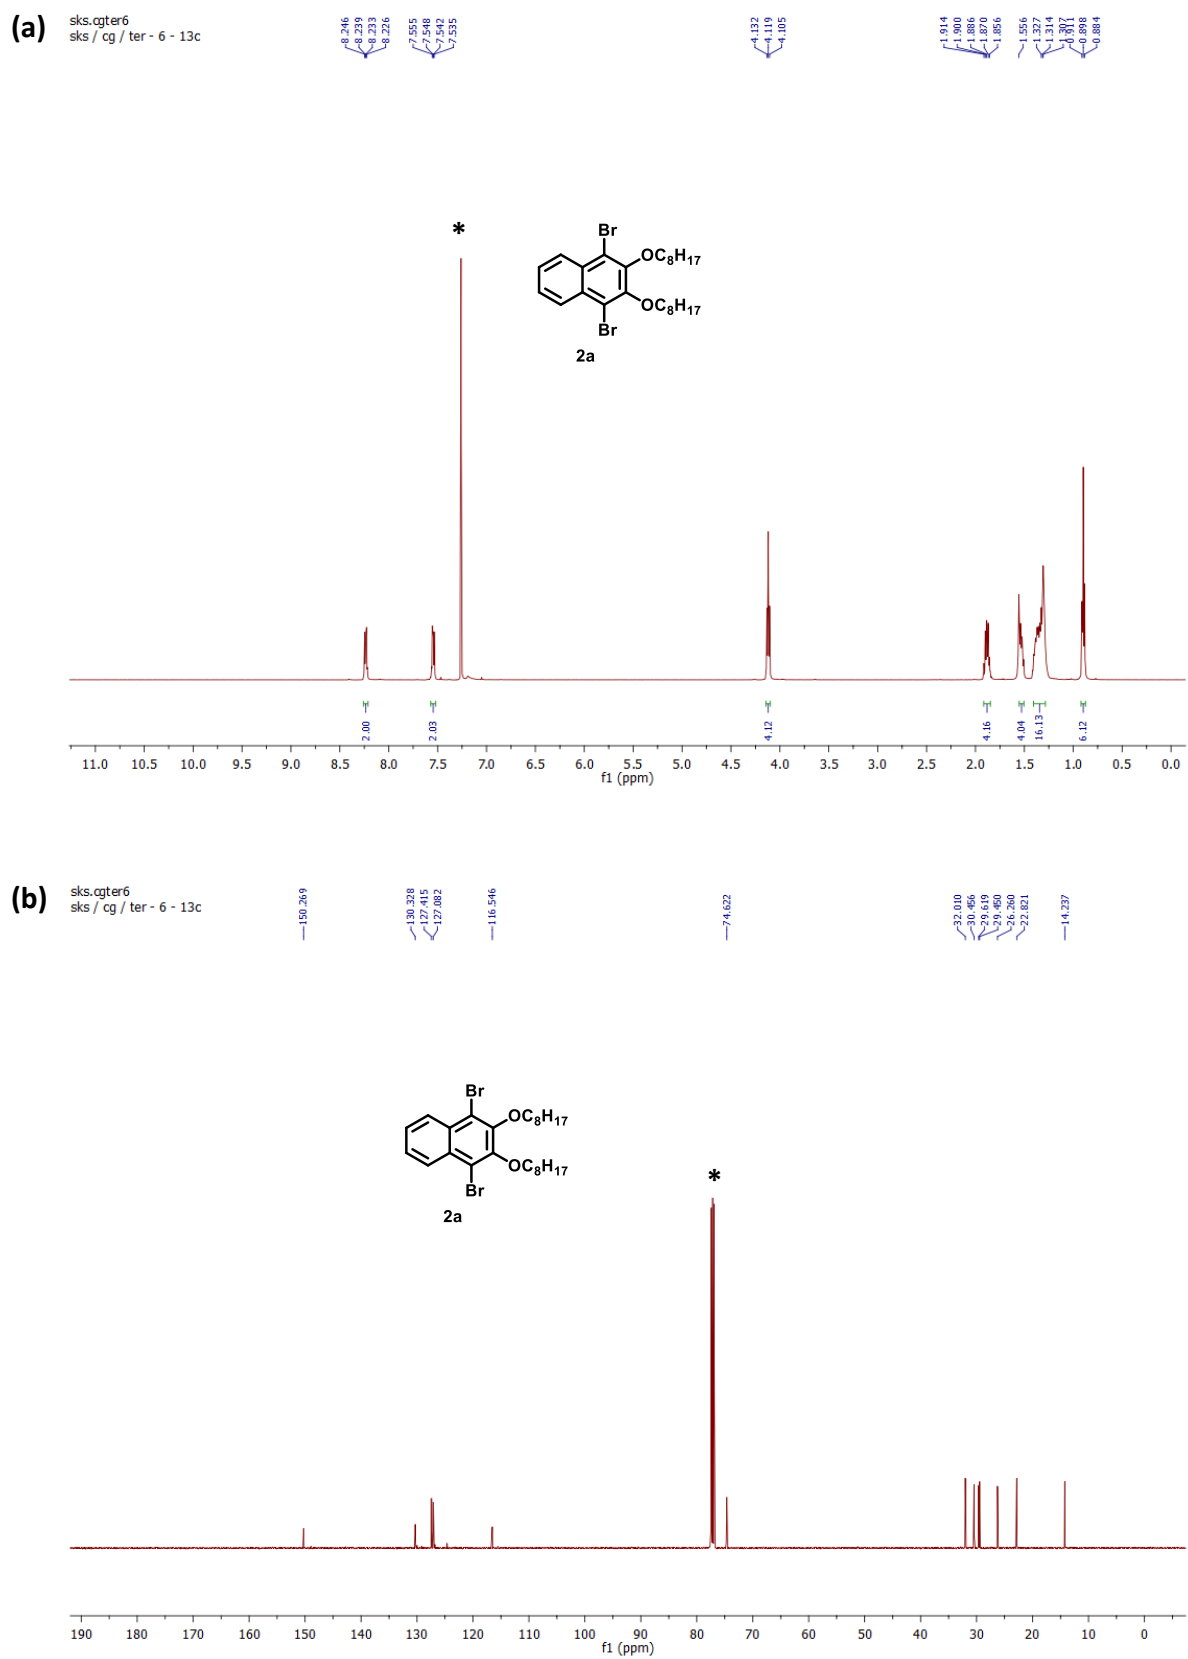

**Fig. S4.** (a)  $^1\text{H}$  and (b)  $^{13}\text{C}$  NMR spectra of **2a** in  $\text{CDCl}_3$  (\*) at 298K.

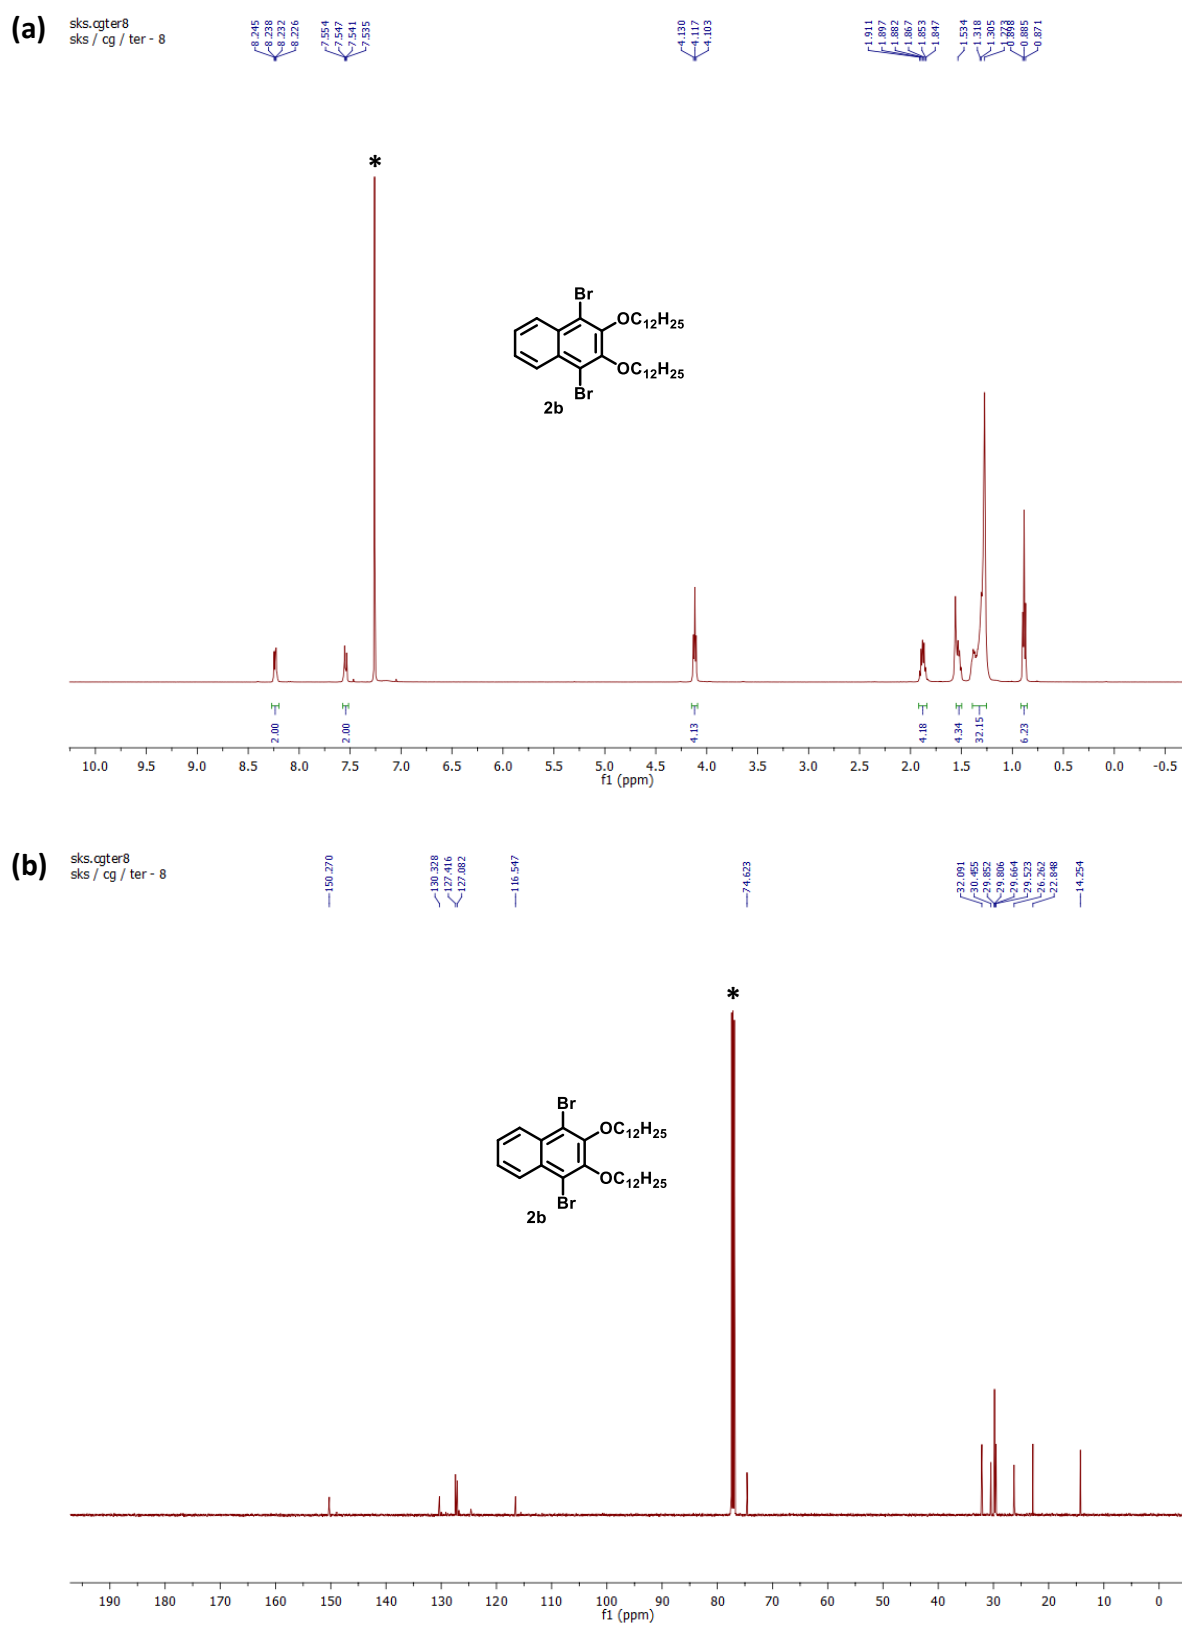

Fig. S5. (a)  $^1\text{H}$  and (b)  $^{13}\text{C}$  NMR spectra of **2b** in  $\text{CDCl}_3$  (\*) at 298K.

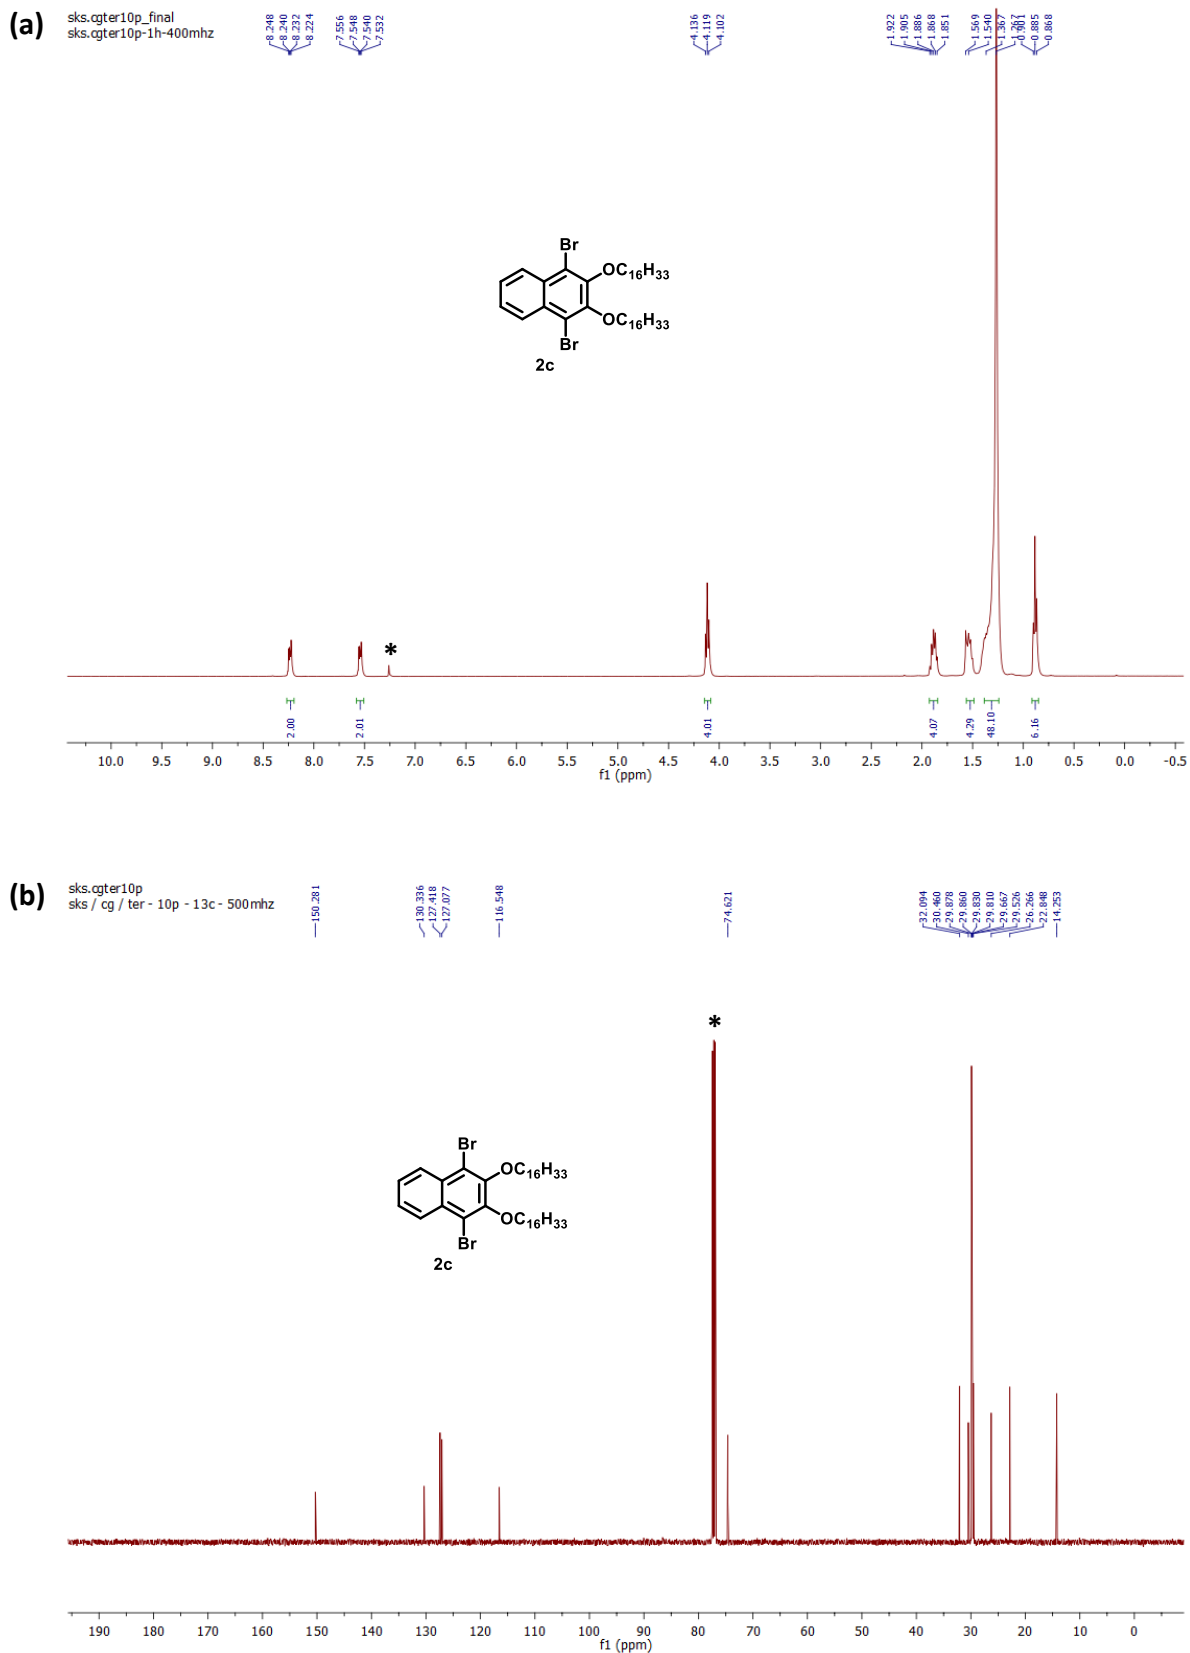

**Fig. S6.** (a) <sup>1</sup>H and (b) <sup>13</sup>C NMR spectra of **2c** in CDCl<sub>3</sub> (\*) at 298K.

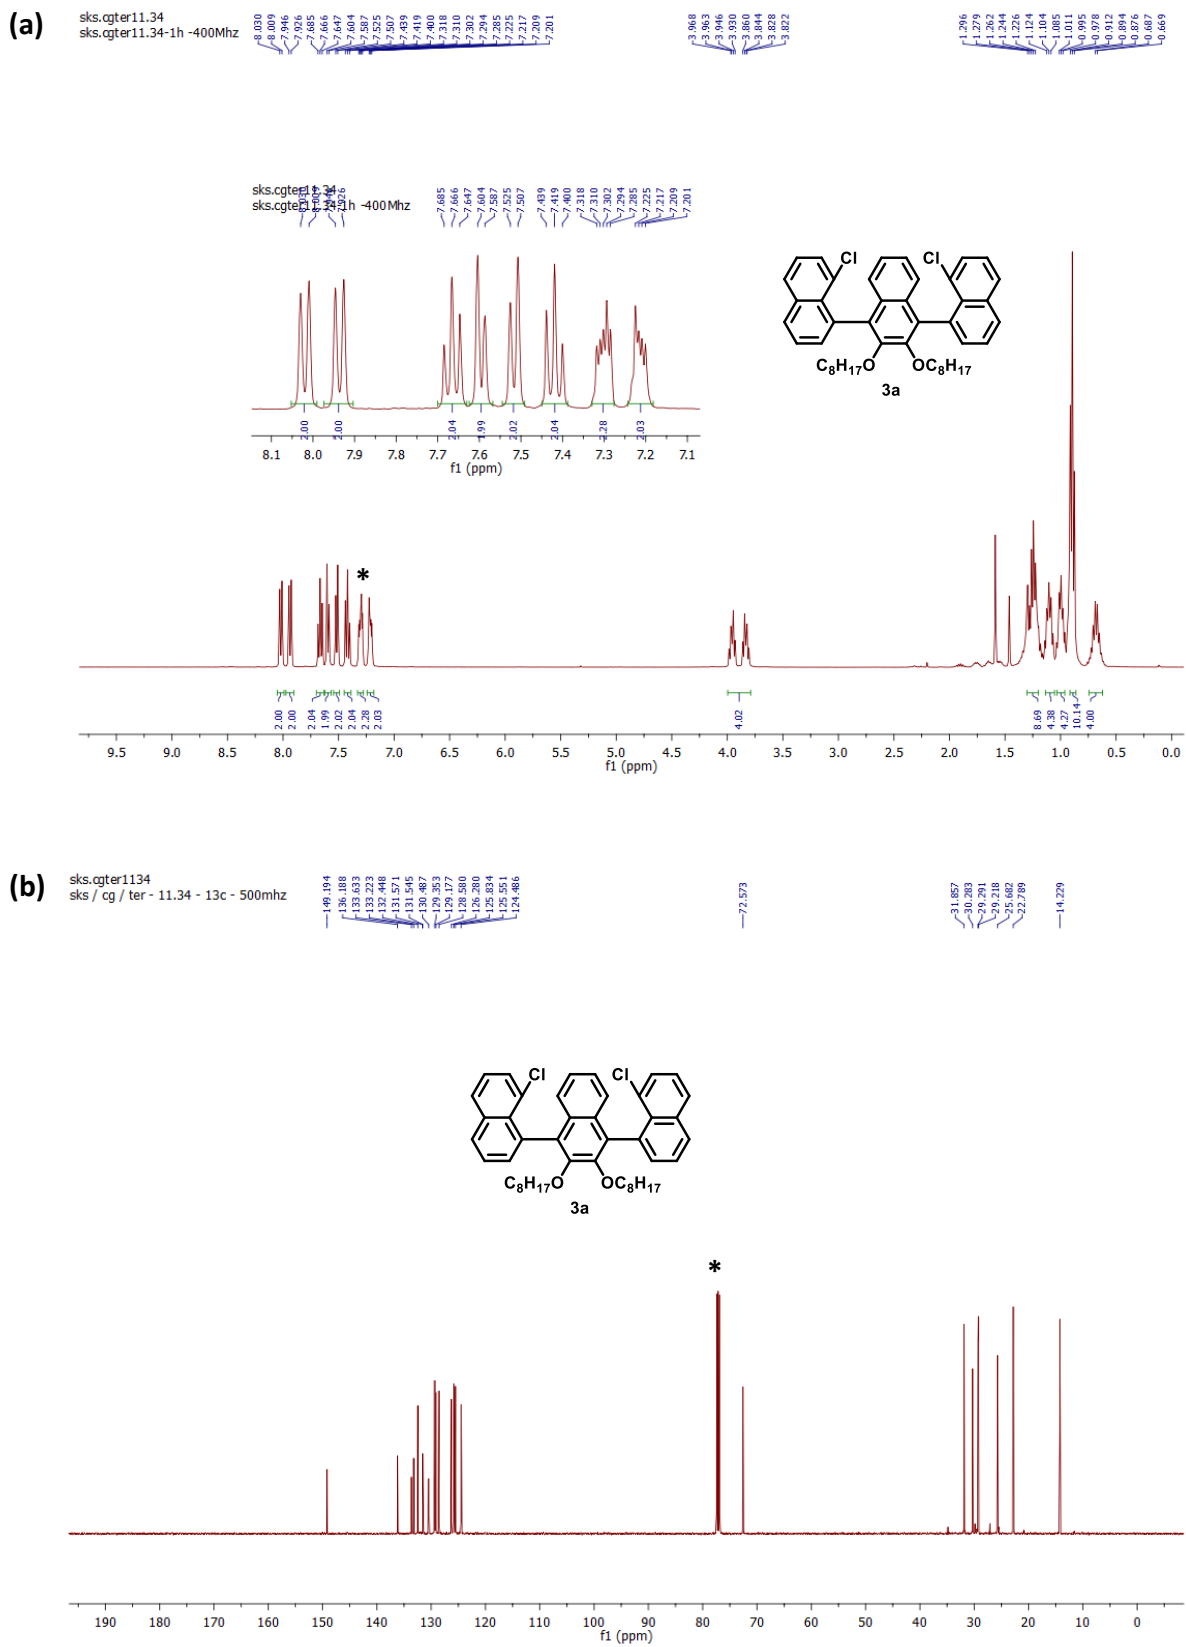

**Fig. S7.** (a) <sup>1</sup>H and (b) <sup>13</sup>C NMR spectra of **3a** in CDCl<sub>3</sub> (\*) at 298K.

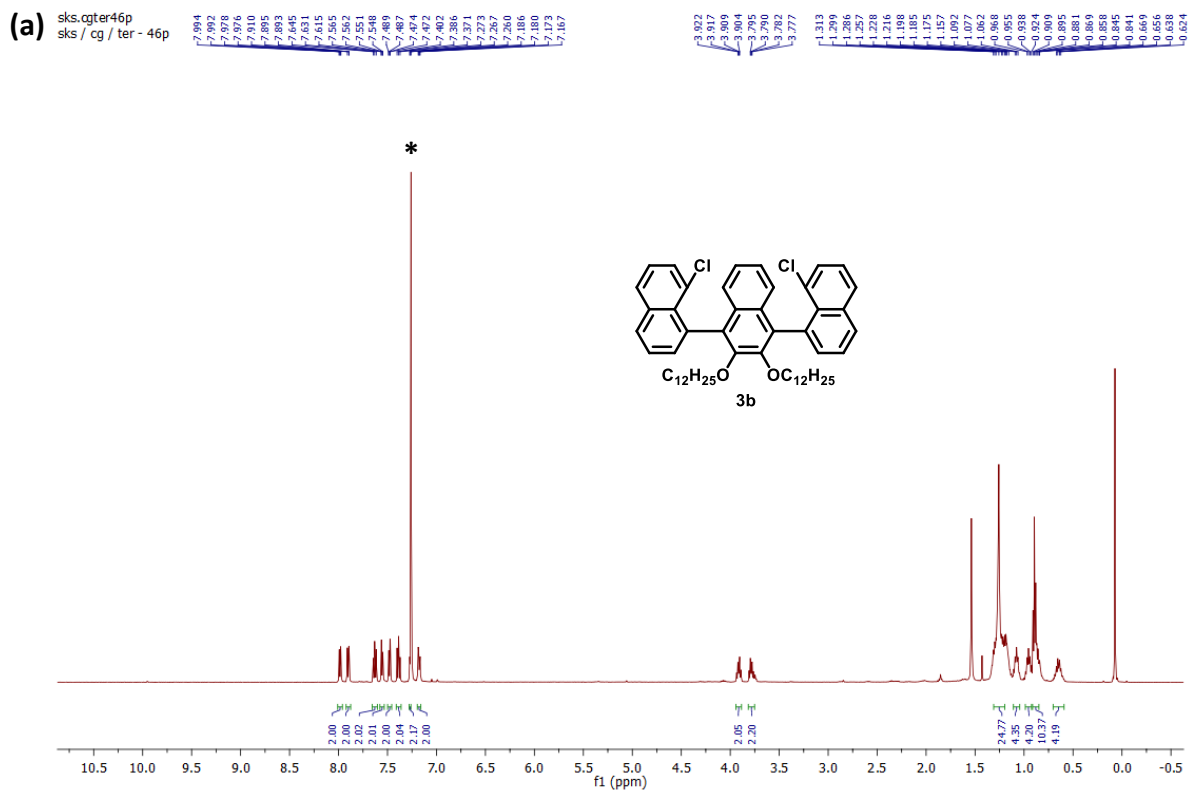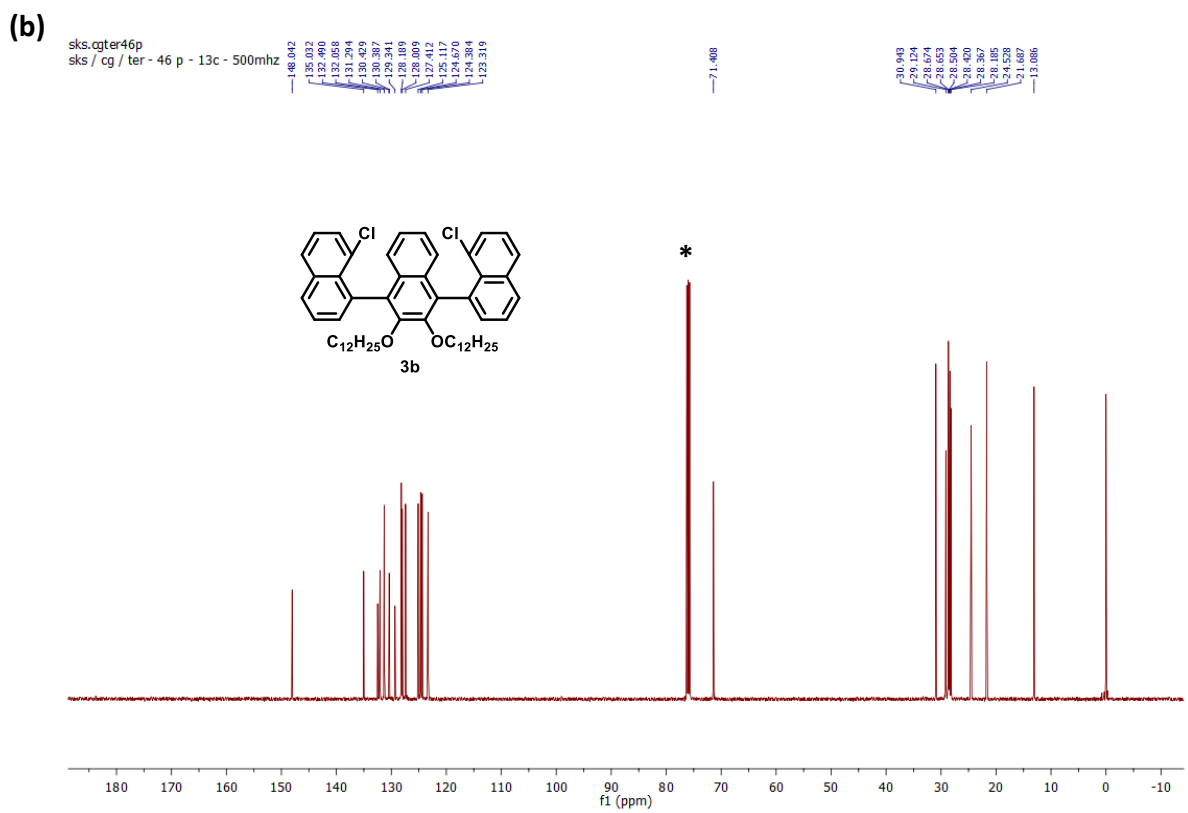

Fig. S8. (a)  $^1\text{H}$  and (b)  $^{13}\text{C}$  NMR spectra of **3b** in  $\text{CDCl}_3$  (\*) at 298K.



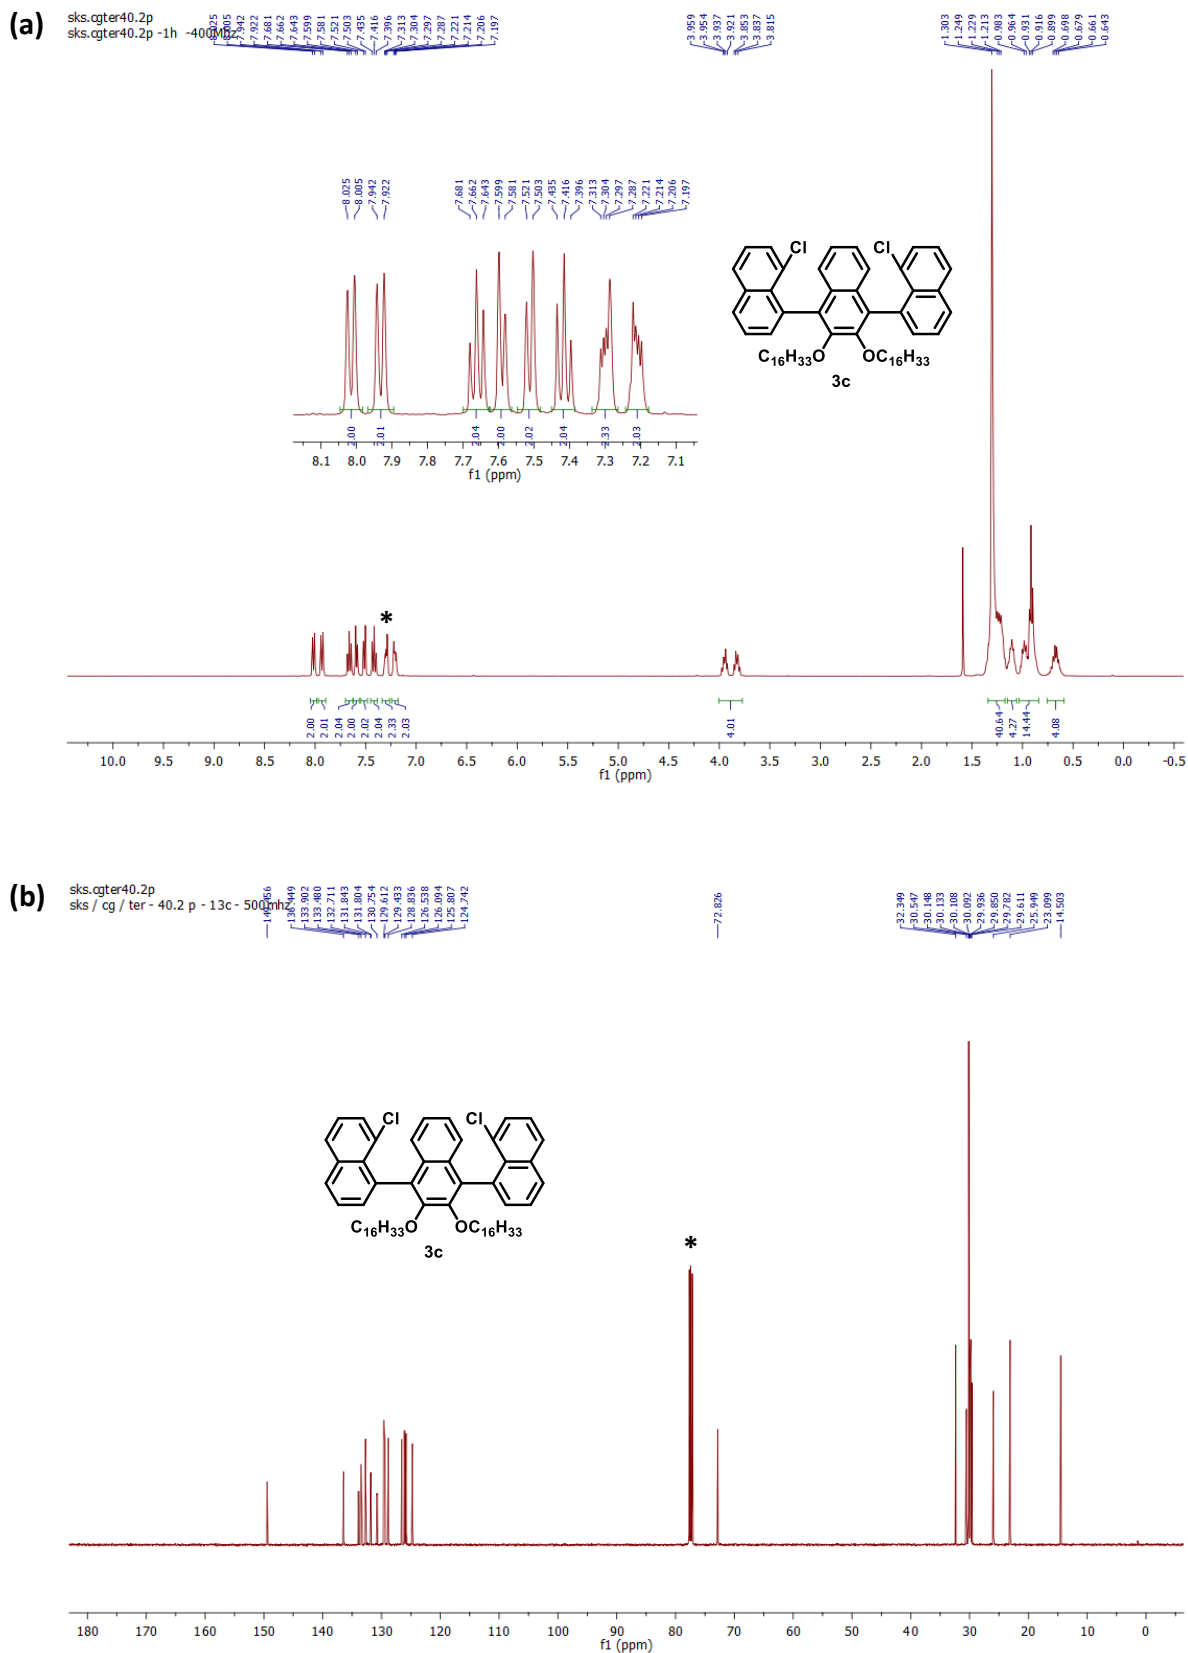

**Fig. S9.** (a)  $^1\text{H}$  and (b)  $^{13}\text{C}$  NMR spectra of **3c** in  $\text{CDCl}_3$  (\*) at 298K.

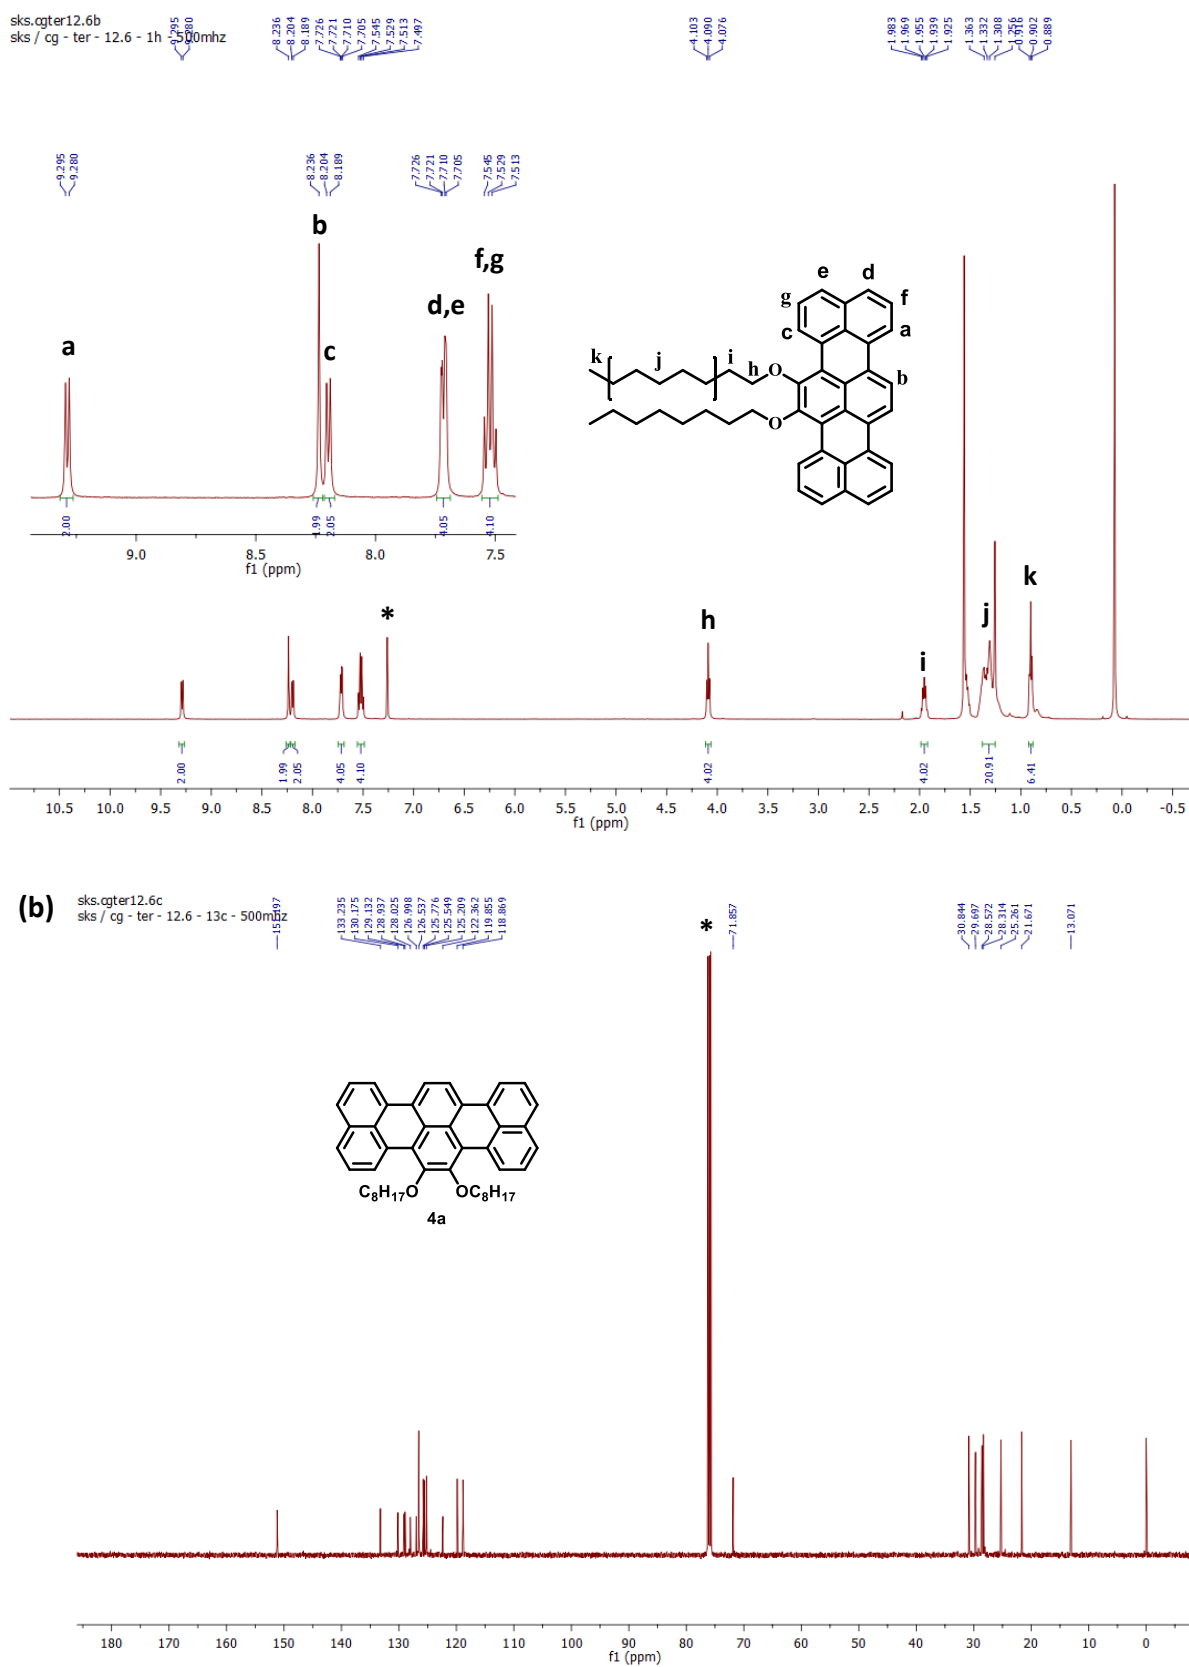

**Fig. S10.** (a)  $^1\text{H}$  and (b)  $^{13}\text{C}$  NMR spectra of **TER-C8 (4a)** in  $\text{CDCl}_3$  (\*) at 298K.

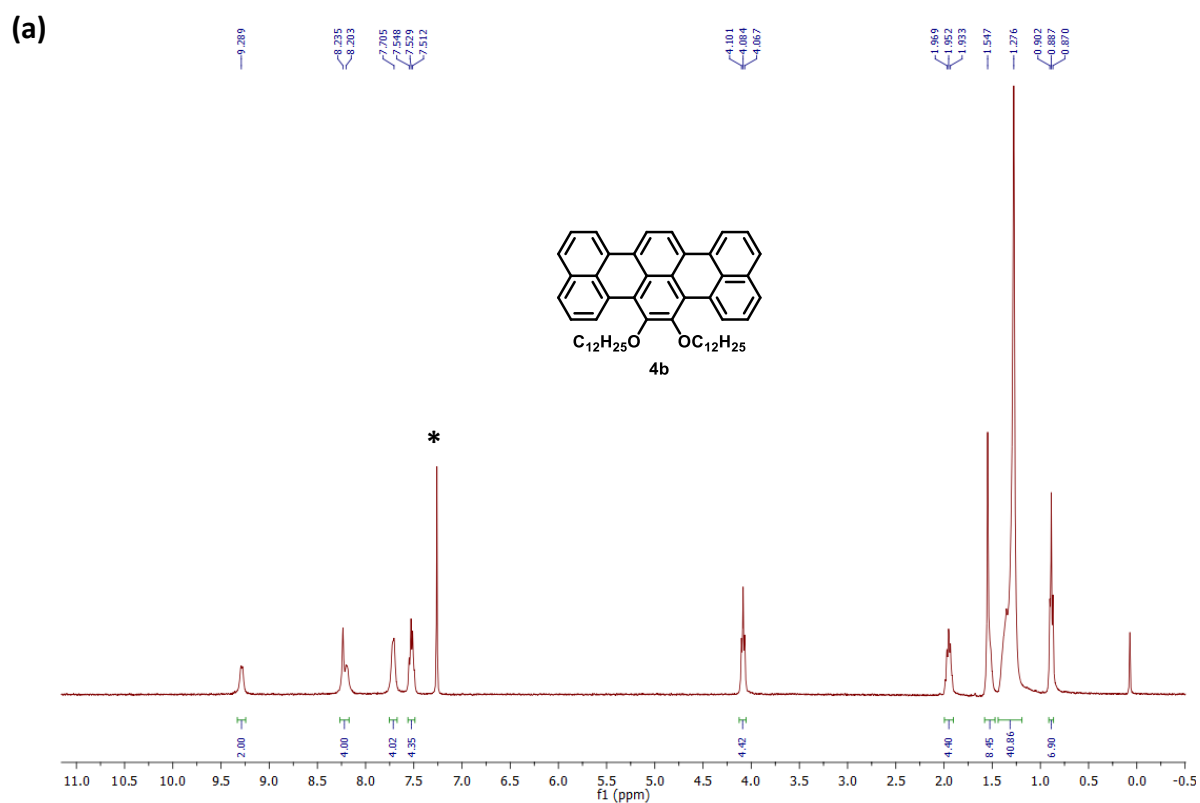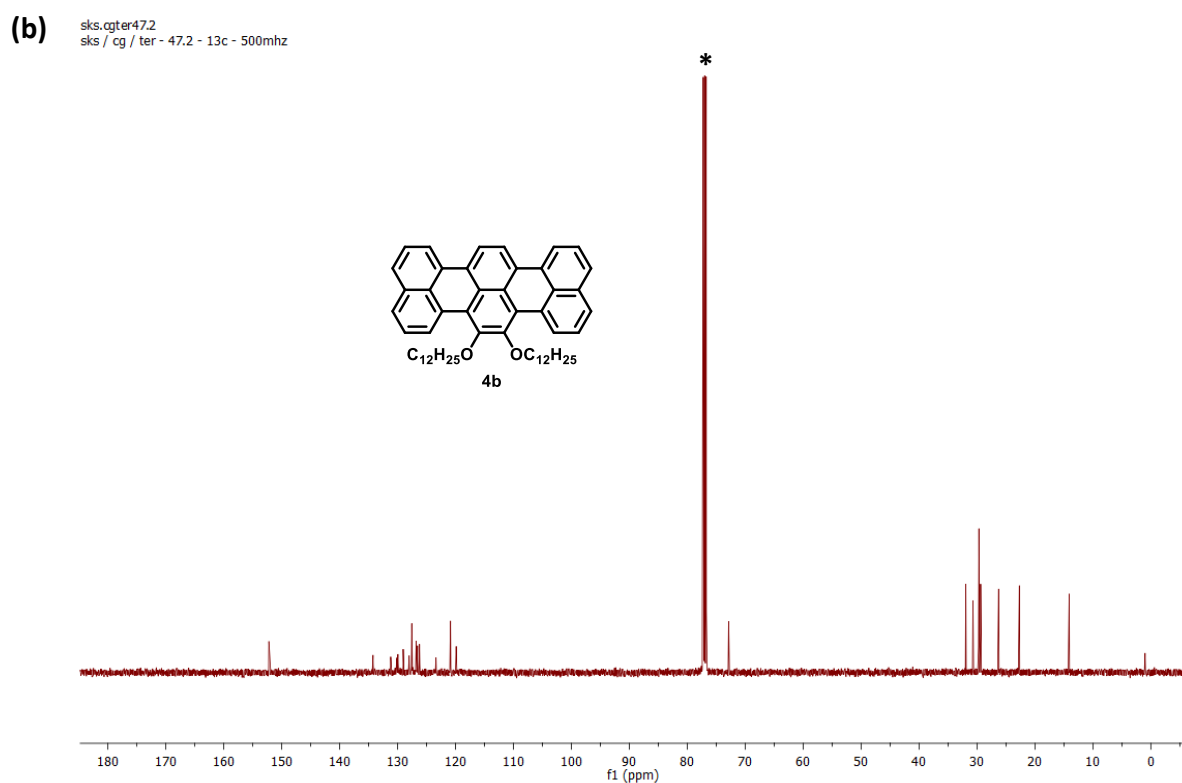

**Fig. S11.** (a)  $^1\text{H}$  and (b)  $^{13}\text{C}$  NMR spectra of **TER-C12 (4b)** in  $\text{CDCl}_3$  (\*) at 298K.

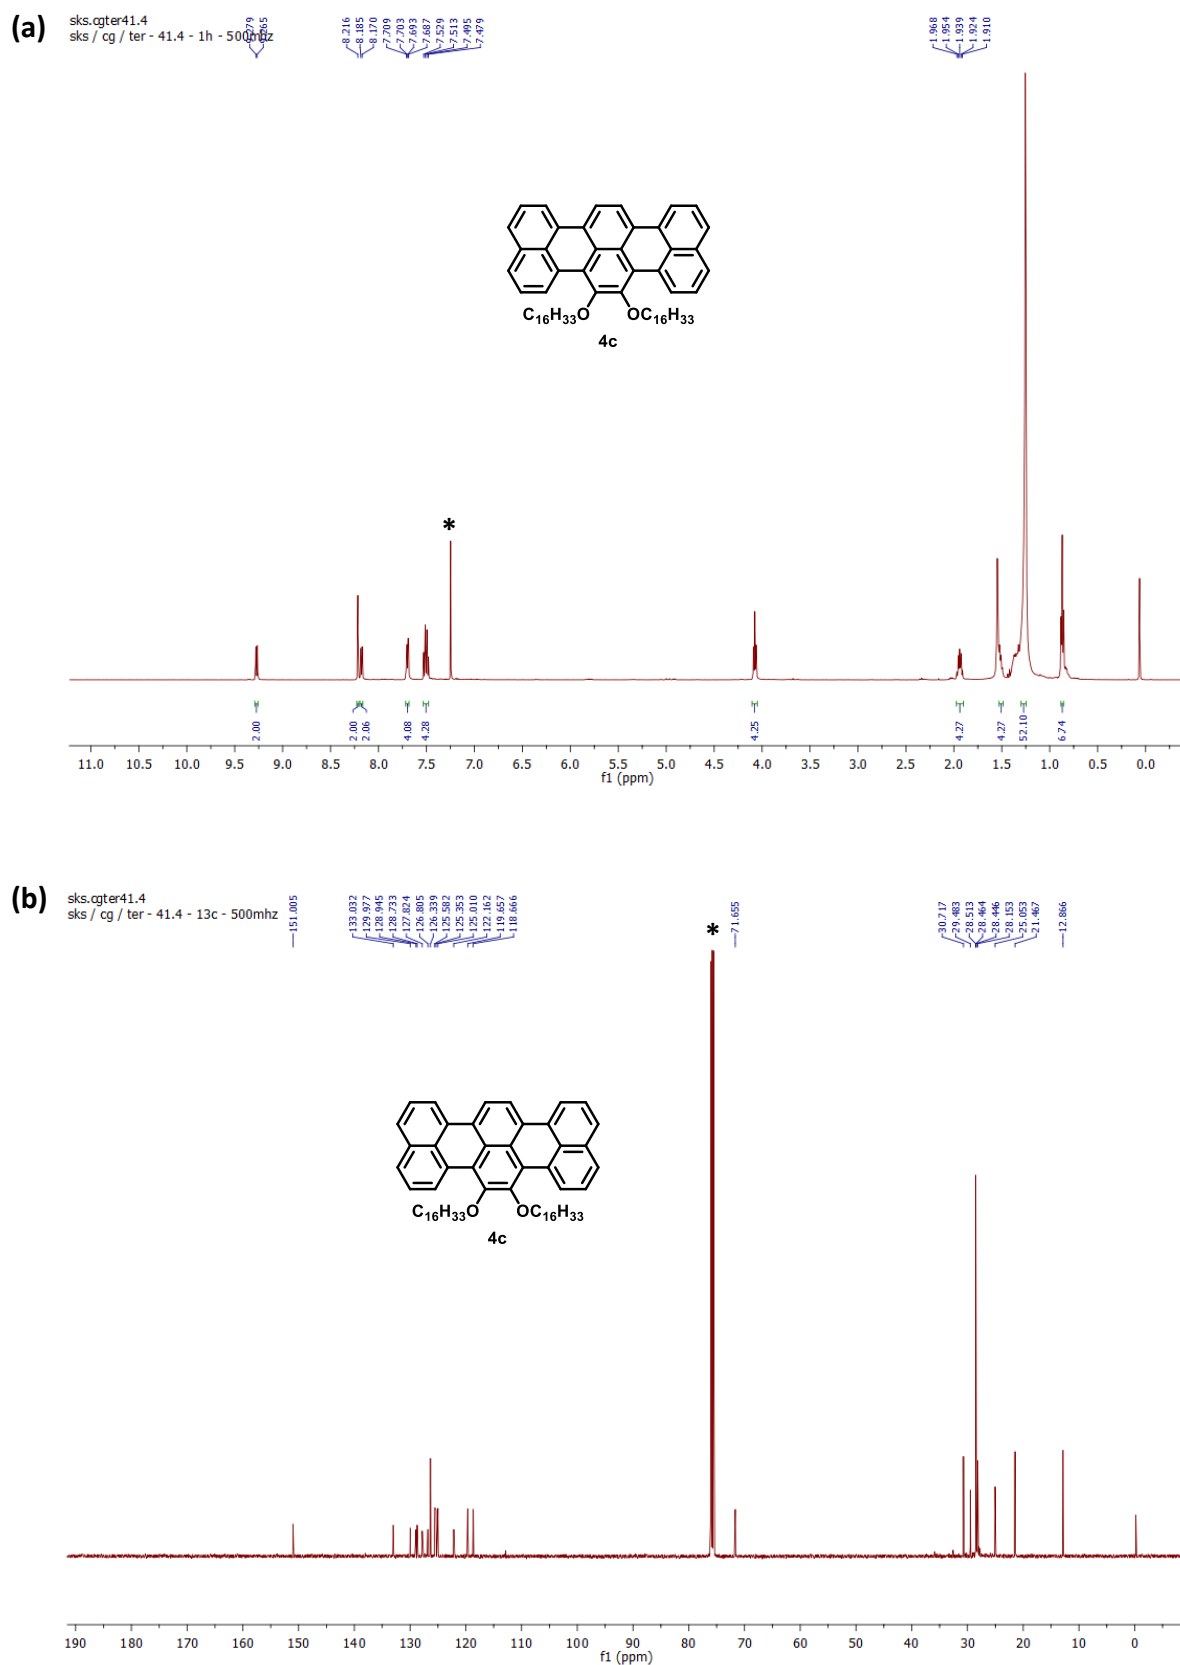

**Fig. S12.** (a)  $^1\text{H}$  and (b)  $^{13}\text{C}$  NMR spectra of **TER-C16 (4c)** in  $\text{CDCl}_3$  (\*) at 298K.

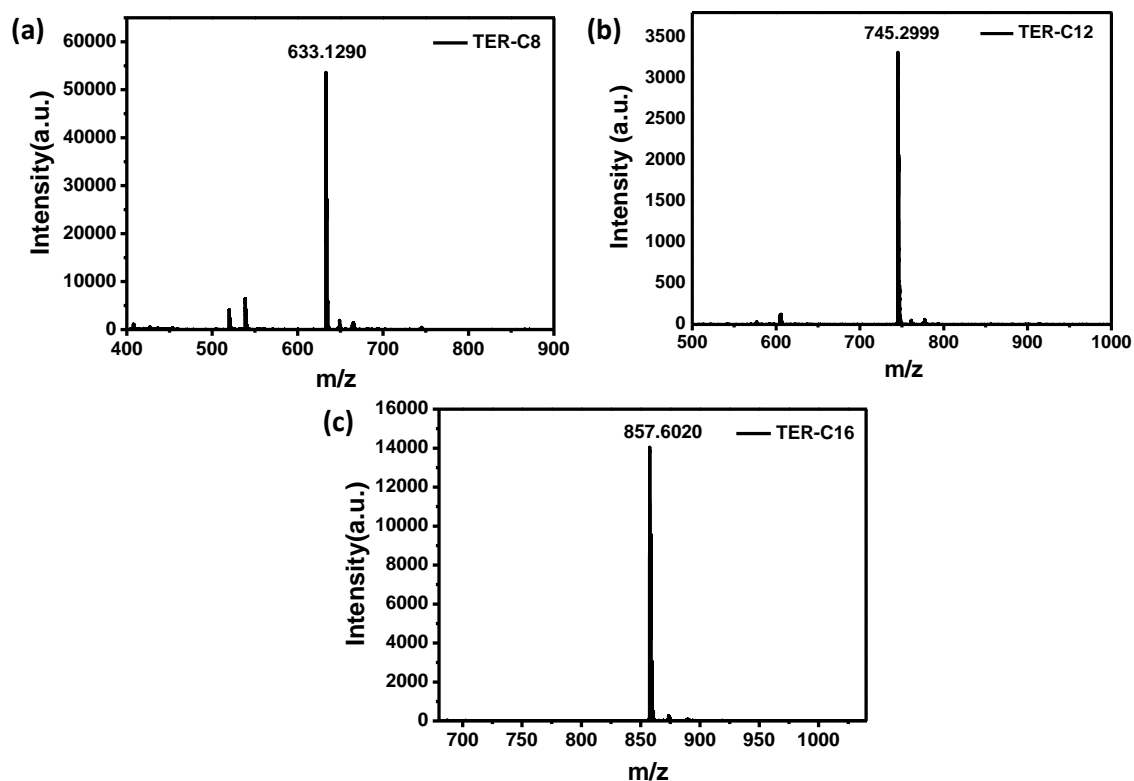

Fig. S13. MALDI-ToF spectra of (a)TER-C8, (b) TER-C12 and (c) TER-C16.

#### Cost Analysis for Synthesizing 1g of TER-C8.

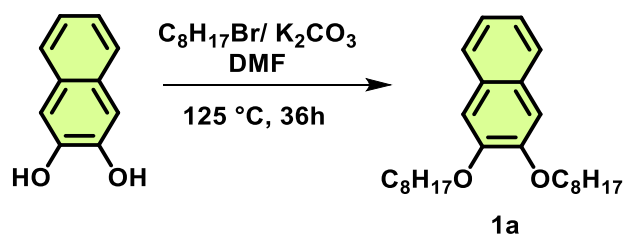

Table S1. Estimated cost of synthesis of intermediate **1a**.

| Chemicals                          | Supplier   | Price (\$) | Reagents required for batch preparation | Total cost (\$) |
|------------------------------------|------------|------------|-----------------------------------------|-----------------|
| 2,3-dihydroxynaphthalene           | Alfa Aesar | 0.66 \$/g  | 1 g                                     | 0.66            |
| $\text{K}_2\text{CO}_3$            | SRL        | 0.01 \$/g  | 8.6 g                                   | 0.086           |
| DMF                                | SRL        | 10.6 \$/L  | 20 ml                                   | 0.212           |
| $\text{C}_8\text{H}_{17}\text{Br}$ | SRL        | 90 \$/L    | 2.8 ml                                  | 0.252           |
| <b>Total Cost</b>                  |            |            |                                         | <b>1.21</b>     |

Yield = 2.3 g, Cost of 1g of **1a** is 0.52 \$

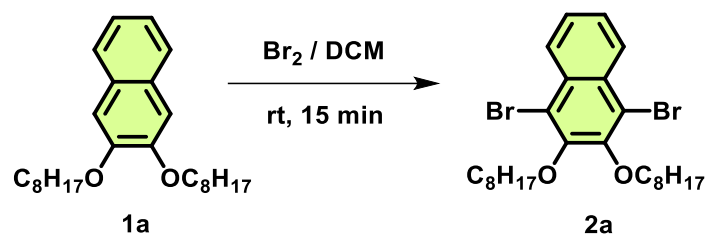

**Table S2.** Estimated cost of synthesis of intermediate **2a**.

| Chemicals         | Supplier    | Price (\$) | Reagents required for batch preparation | Total cost (\$) |
|-------------------|-------------|------------|-----------------------------------------|-----------------|
| <b>1a</b>         |             | 0.52 \$/g  | 1 g                                     | 0.52            |
| Bromine           | Spectrochem | 113 \$/L   | 0.28 mL                                 | 0.03            |
| DCM               | Local       | 8 \$/L     | 50 ml                                   | 0.4             |
| <b>Total Cost</b> |             |            |                                         | <b>0.95</b>     |

Yield = 1.27 g, Cost of 1g of **2a** is 0.75 \$.

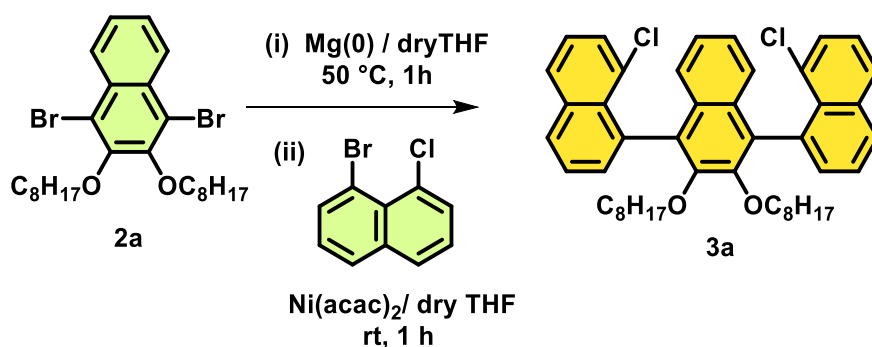

**Table S3.** Estimated cost of synthesis of intermediate **3a**.

| Chemicals                   | Supplier  | Price (\$) | Reagents required for batch preparation | Total cost (\$) |
|-----------------------------|-----------|------------|-----------------------------------------|-----------------|
| <b>2a</b>                   |           | 0.75 \$/g  | 1 g                                     | 0.75            |
| 1-bromo-8-chloronaphthalene | BLD Pharm | 3.5 \$/g   | 0.9 g                                   | 3.15            |
| Mg turnings                 | Sigma     | 0.26 \$/g  | 0.45 g                                  | 0.12            |
| Ni(acac) <sub>2</sub>       | Sigma     | 5.4 \$/g   | 0.012 g                                 | 0.06            |
| THF                         | Finar     | 15 \$/L    | 15 ml                                   | 0.1             |
| Silica gel                  | Local     | 17 \$/kg   | 80 g                                    | 1.36            |
| Petroleum ether             | Local     | 5 \$/L     | 300 ml                                  | 1.6             |
| CHCl <sub>3</sub>           | Finar     | 8 \$/L     | 50 ml                                   | 0.4             |
| Total                       |           |            |                                         | 7.54            |

Yield = 0.48 g, Cost of 1 g of **4a** is 15.7 \$

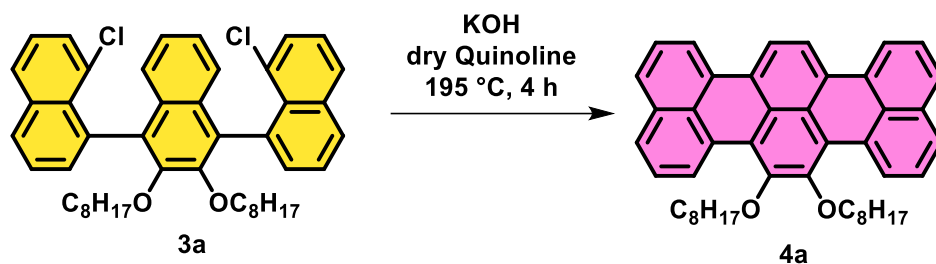

**Table S4.** Estimated cost of synthesis of intermediate **3a**.

| Chemicals         | Supplier | Price (\$) | Reagents required for batch preparation | Total cost (\$) |
|-------------------|----------|------------|-----------------------------------------|-----------------|
| <b>3a</b>         |          | 15.7 \$/g  | 200 mg                                  | 3.14            |
| KOH               | SRL      | 0.012 \$/g | 15 g                                    | 0.18            |
| Quinoline         | SRL      | 43.5 \$/L  | 2 mL                                    | 0.09            |
| Silica gel        | Local    | 17 \$/kg   | 80 g                                    | 1.36            |
| Petroleum ether   | Local    | 5 \$/L     | 300 ml                                  | 1.6             |
| CHCl <sub>3</sub> | Finar    | 8 \$/L     | 50 ml                                   | 0.4             |
| Total             |          |            |                                         | 6.77            |

**Yield = 0.11 g, Cost of 1g of 5a is 61.5 \$**

**Table S5.** Cost comparison between commercially available unsubstituted terylene and our synthesized **TER-C8**.

| Chemicals     | Supplier         | Price (\$)       |
|---------------|------------------|------------------|
| Terylene      | Alfa Chemistry   | 130000 \$/g      |
| Terylene      | BLD Pharm        | 9240 \$/g        |
| <b>TER-C8</b> | <b>This Work</b> | <b>61.5 \$/g</b> |

Characterization:

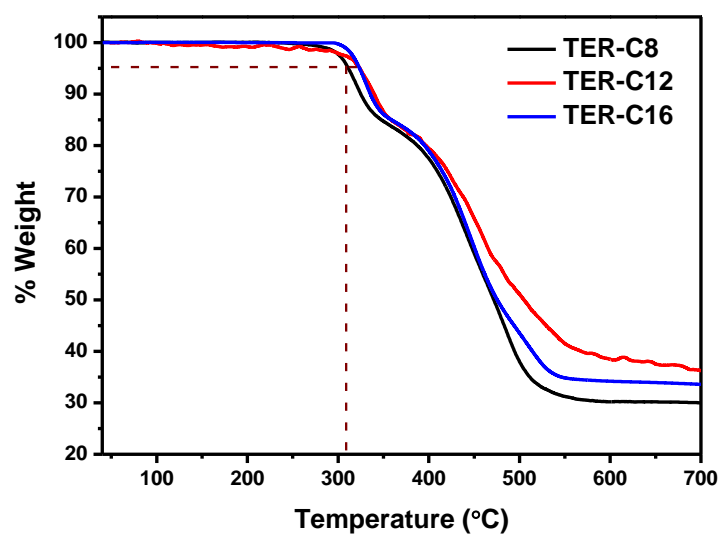

Fig. S14. Thermogravimetric analysis plot of TER-C8, TER-C12 and TER-C16.

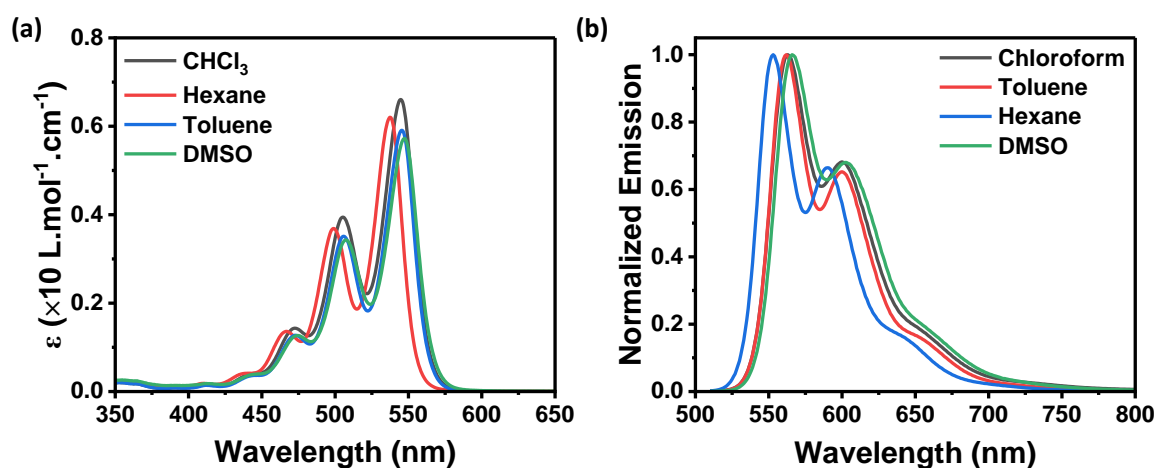

Fig. S15. (a) UV-vis and (b) fluorescence emission spectra of TER-C8 in different solvents (10  $\mu$ M).

Table S6. Absorption and emission maxima of TER-C8 in different solvents.

|                            | Chloroform | Hexane | Toluene | DMSO |
|----------------------------|------------|--------|---------|------|
| $\lambda_{abs}^{max}$ (nm) | 544        | 537    | 545     | 547  |
| $\lambda_{em}^{max}$ (nm)  | 563        | 553    | 562     | 566  |



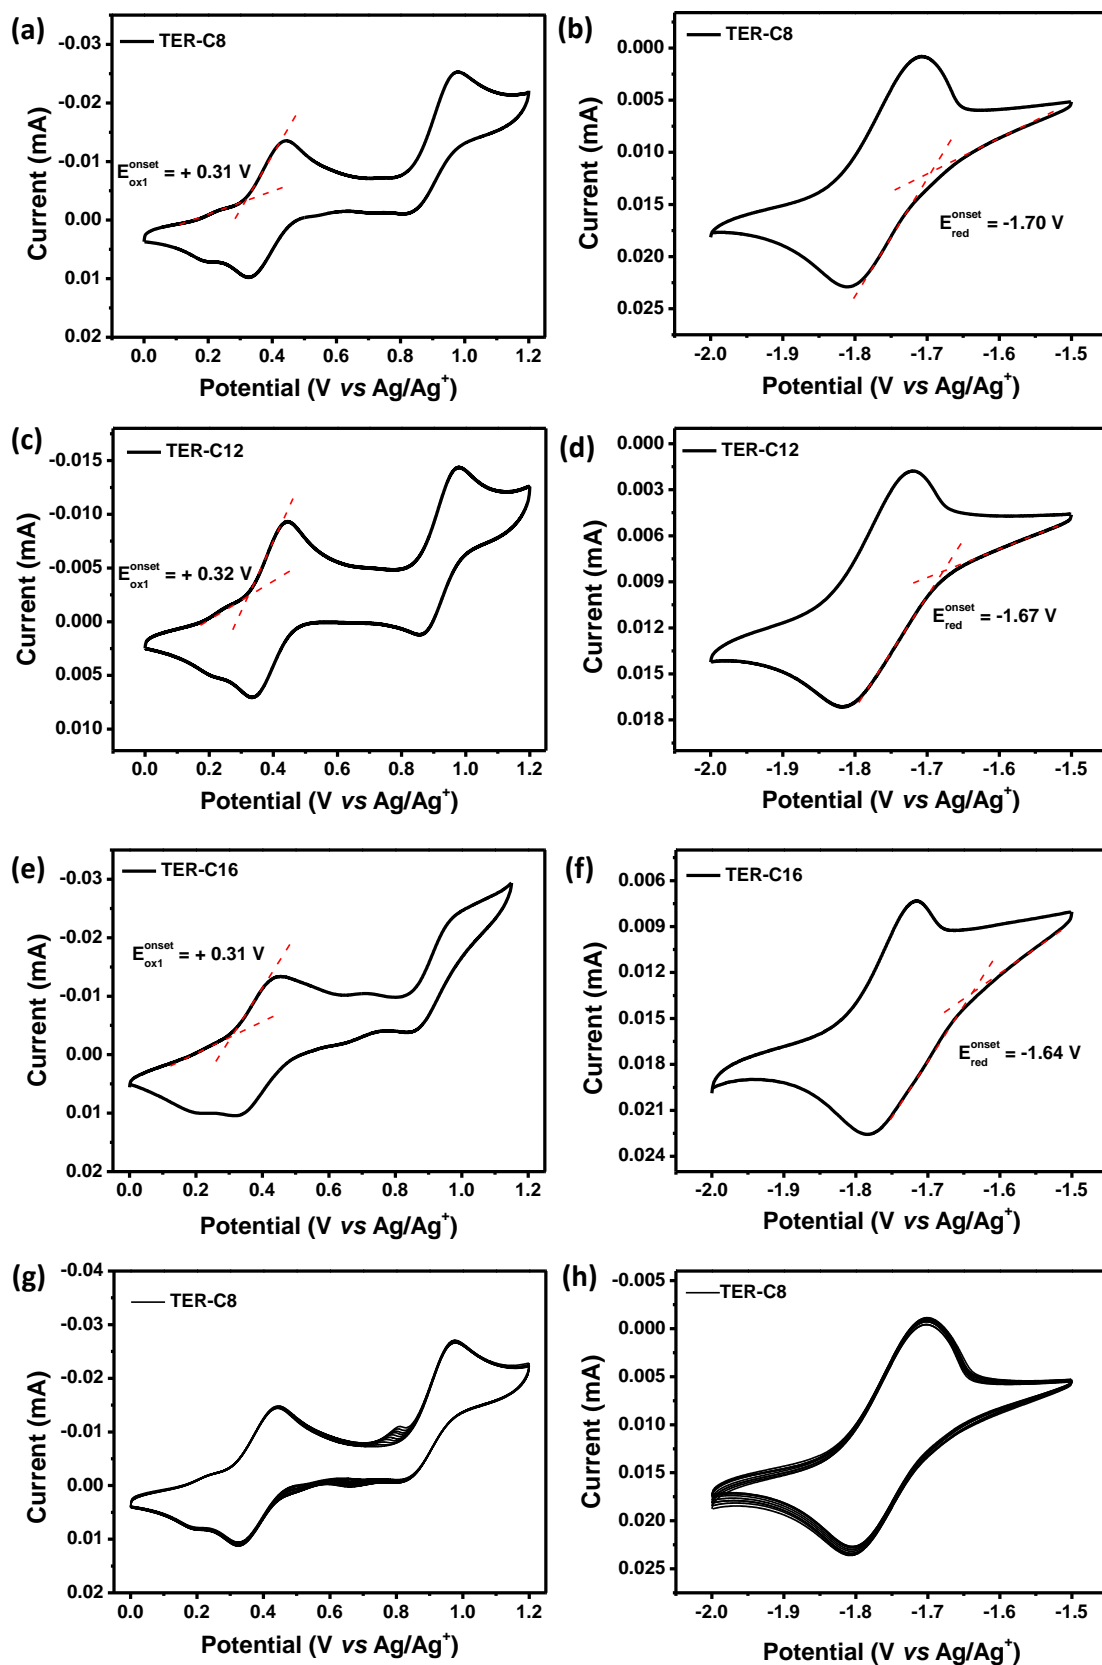

**Fig. S16.** Cyclic Voltammograms of **TER-C8** (a, b), **TER-C12** (c, d), **TER-C16** (e, f) and the electrochemical stability of **TER-C8** (g, h).

**Table S7.** Redox properties and energy levels of as synthesized 7,8-bis(alkyloxy)terrylenes.

|                | $E_{onset}^{ox}$ (V) | $E_{onset}^{red}$ (V) | $E_{HOMO}^{CV}$ (eV) | $E_{LUMO}^{CV}$ (eV) | $E_g^{CV}$ (eV) |
|----------------|----------------------|-----------------------|----------------------|----------------------|-----------------|
| <b>TER-C8</b>  | +0.31                | -1.70                 | -5.19                | -3.18                | 2.01            |
| <b>TER-C12</b> | +0.32                | -1.67                 | -5.20                | -3.21                | 1.99            |
| <b>TER-C16</b> | +0.31                | -1.64                 | -5.19                | -3.24                | 1.95            |

### Thermal Properties

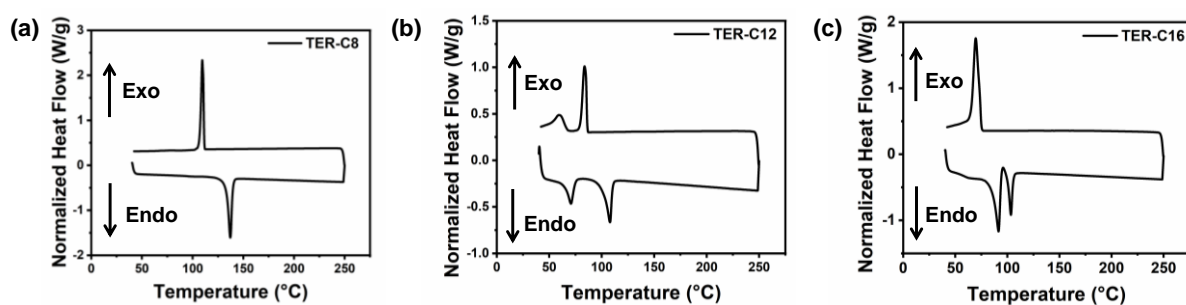

**Fig. S17.** Differential scanning calorimetry (DSC) thermograms of (a) **TER-C8**, (b) **TER-C12** and (c) **TER-C16**.

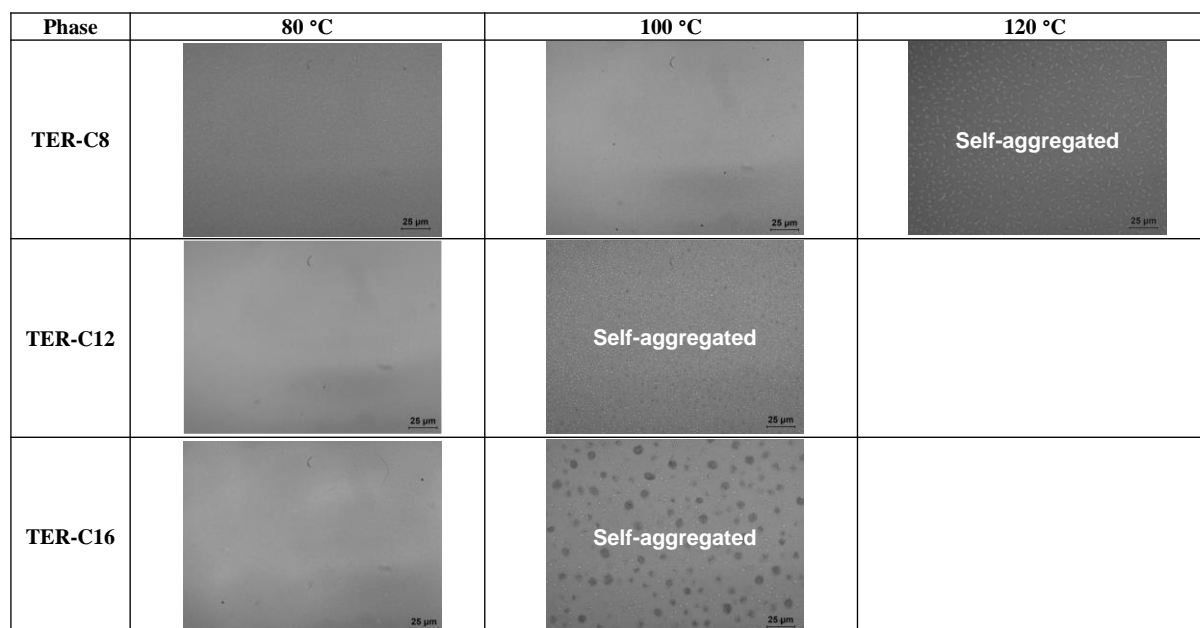

**Fig. S18.** Optical microscope images of the small molecules with different annealing temperatures.

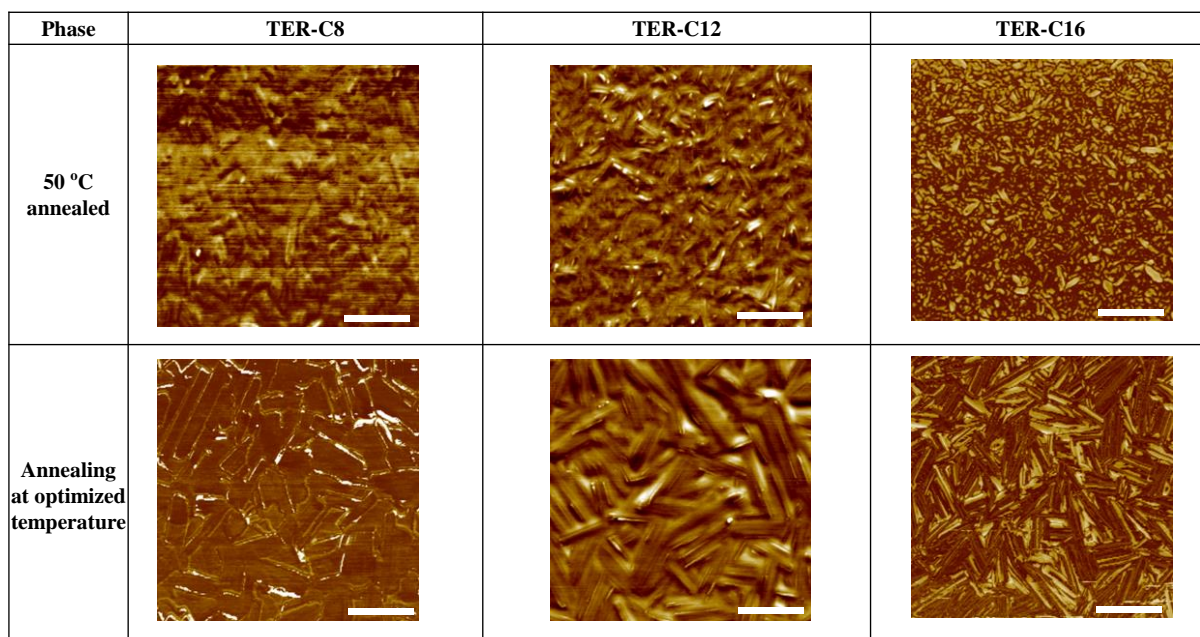

**Fig. S19.** AFM phase images of the small molecules after low and optimized temperature annealing. Scale bars, 500 nm.

**Table S8.** Hole mobilities during optimization of thermal annealing temperature.

| Annealing Temperature (°C) | TER-C8                                                      |                   |              | TER-C12                                                     |                   |              | TER-C16                                                     |                   |              |
|----------------------------|-------------------------------------------------------------|-------------------|--------------|-------------------------------------------------------------|-------------------|--------------|-------------------------------------------------------------|-------------------|--------------|
|                            | $\mu_{h,avg}$ ( $\text{cm}^2 \text{V}^{-1} \text{s}^{-1}$ ) | $I_{on}/I_{off}$  | $V_{th}$ (V) | $\mu_{h,avg}$ ( $\text{cm}^2 \text{V}^{-1} \text{s}^{-1}$ ) | $I_{on}/I_{off}$  | $V_{th}$ (V) | $\mu_{h,avg}$ ( $\text{cm}^2 \text{V}^{-1} \text{s}^{-1}$ ) | $I_{on}/I_{off}$  | $V_{th}$ (V) |
| 50                         | $8.1 \times 10^{-4}$                                        | $3.4 \times 10^3$ | -7.7         | $8.7 \times 10^{-5}$                                        | $8.1 \times 10^3$ | -1.3         | $1.1 \times 10^{-5}$                                        | $1.8 \times 10^3$ | 12.4         |
| 80                         | $1.5 \times 10^{-3}$                                        | $2.8 \times 10^4$ | -4.8         | $3.5 \times 10^{-4}$                                        | $1.5 \times 10^4$ | -2.2         | $3.6 \times 10^{-5}$                                        | $2.9 \times 10^3$ | -6.9         |
| 100                        | $3.0 \times 10^{-3}$                                        | $4.9 \times 10^5$ | -10.1        | $1.5 \times 10^{-4}$                                        | $5.3 \times 10^5$ | -6.3         | -                                                           | -                 | -            |
| 120                        | $1.1 \times 10^{-3}$                                        | $3.6 \times 10^4$ | -18.4        | -                                                           | -                 | -            | -                                                           | -                 | -            |

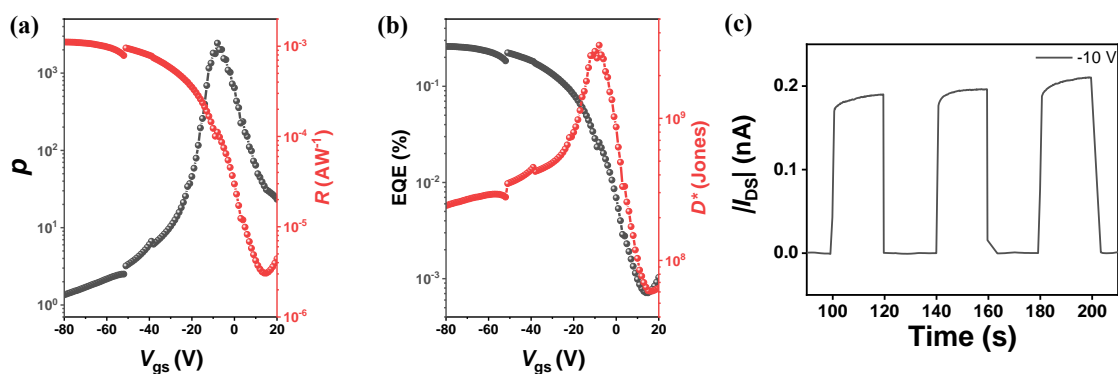

**Fig. S20.** (a) Photosensitivity, responsivity, (b) EQE and detectivity of **TER-C12** as a function of the gate voltage. (c) Time-dependent photoresponse characteristics of **TER-C12** under periodic dark and light illumination conditions.

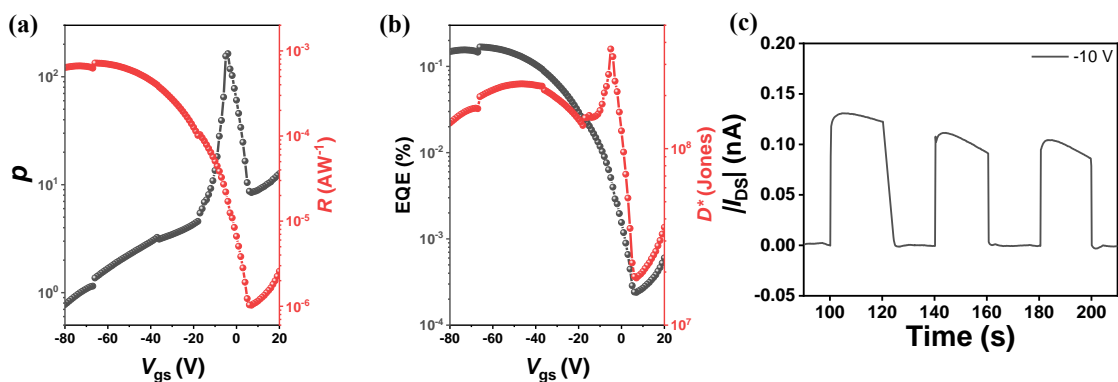

**Fig. S21.** (a) Photosensitivity, responsivity, (b) EQE and detectivity of **TER-C16** as a function of the gate voltage. (c) Time-dependent photoresponse characteristics of **TER-C16** under periodic dark and light illumination conditions.

**Table S9.** Summary of optoelectronic characteristics ( $p$ ,  $R$ , EQE and  $D^*$ ) of the small molecules.  $V_{ds} = -80$  V.

|                        | <b>TER-C8</b>        | <b>TER-C12</b>       | <b>TER-C16</b>       |
|------------------------|----------------------|----------------------|----------------------|
| $p_{MAX}$              | $2.5 \times 10^4$    | $2.4 \times 10^3$    | $1.6 \times 10^2$    |
| $R_{MAX}$ (A/W)        | $1.5 \times 10^{-2}$ | $1.1 \times 10^{-3}$ | $7.2 \times 10^{-4}$ |
| EQE <sub>MAX</sub> (%) | 3.6                  | 0.26                 | 0.17                 |
| $D^*_{MAX}$ (Jones)    | $2.1 \times 10^{10}$ | $3.3 \times 10^9$    | $3.7 \times 10^8$    |

## Reference.

1. Y. Wang, Q. Liao, J. Chen, W. Huang, X. Zhuang, Y. Tang, B. Li, X. Yao, X. Feng, X. Zhang, M. Su, Z. He, T. J. Marks, A. Facchetti and X. Guo, Teaching an Old Anchoring Group New Tricks: Enabling Low-Cost, Eco-Friendly Hole-Transporting Materials for Efficient and Stable Perovskite Solar Cells, *J. Am. Chem. Soc.*, 2020, **142**, 16632-16643.
2. A. D. Becke, Density-functional thermochemistry. I. The effect of the exchange-only gradient correction, *J. Chem. Phys.*, 1992, **96**, 2155-2160.
3. C. Lee, W. Yang and R. G. Parr, Development of the Colle-Salvetti correlation-energy formula into a functional of the electron density, *Phys. Rev. B.*, 1988, **37**, 785-789.
4. M. J. Frisch, G. W. Trucks, H. B. Schlegel, G. E. Scuseria, M. A. Robb, J. R. Cheeseman, G. Scalmani, V. Barone, G. A. Petersson, H. Nakatsuji, X. Li, M. Caricato, A. V. Marenich, J. Bloino, B. G. Janesko, R. Gomperts, B. Mennucci, H. P. Hratchian, J. V. Ortiz, A. F. Izmaylov, J. L. Sonnenberg, Williams, F. Ding, F. Lipparini, F. Egidi, J. Goings, B. Peng, A. Petrone, T. Henderson, D. Ranasinghe, V. G. Zakrzewski, J. Gao, N. Rega, G. Zheng, W. Liang, M. Hada, M. Ehara, K. Toyota, R. Fukuda, J. Hasegawa, M. Ishida, T. Nakajima, Y. Honda, O. Kitao, H. Nakai, T. Vreven, K. Throssell, J. A. Montgomery Jr., J. E. Peralta, F. Ogliaro, M. J. Bearpark, J. J. Heyd, E. N. Brothers, K. N. Kudin, V. N. Staroverov, T. A. Keith, R. Kobayashi, J. Normand, K. Raghavachari, A. P. Rendell, J. C. Burant, S. S. Iyengar, J. Tomasi, M. Cossi, J. M. Millam, M. Klene, C. Adamo, R. Cammi, J. W. Ochterski, R. L. Martin, K. Morokuma, O. Farkas, J. B. Foresman and D. J. Fox, Gaussian 16 Rev. C.01. *Journal*, 2016.
5. R. Dennington, T. Keith and J. Millam, GaussView, version 5, 2009.
6. S. K. Samanta, G. S. Kumar, U. K. Ghorai, U. Scherf, S. Acharya and S. Bhattacharya, Synthesis of High Molecular Weight 1,4-Polynaphthalene for Solution-Processed True Color Blue Light Emitting Diode, *Macromolecules*, 2018, **51**, 8324-8329.
7. L.-P. Yang, F. Jia, Q.-H. Zhou, F. Pan, J.-N. Sun, K. Rissanen, L. W. Chung and W. Jiang, Guest-Induced Folding and Self-Assembly of Conformationally Adaptive Macrocyces into Nanosheets and Nanotubes, *Chem. Eur. J.*, 2017, **23**, 1516-1520.
